# Supplementary material
Source: PubMed Central journal article supplement (PMC3288518)

## Supporting Information

### Analysis of Akt PH Domain Binding via a Rapid Microplate Assay Employing Synthetic Biotinylated Analogs of all Seven Phosphoinositide Headgroup Isomers

Meng M. Rowland,<sup>[a]</sup> Denghuang Gong,<sup>[a]</sup> Heidi E. Bostic,<sup>[a]</sup> Nathan Lucas,<sup>[b]</sup>  
Wonhwa Cho<sup>[b]</sup> and Michael D. Best\*,<sup>[a]</sup>

<sup>[a]</sup> Department of Chemistry, the University of Tennessee  
1420 Circle Drive, Knoxville, TN 37996  
Fax: 865-974-9332  
e-mail: [mdbest@utk.edu](mailto:mdbest@utk.edu)

<sup>[b]</sup> Department of Chemistry, the University of Illinois at Chicago  
845 West Taylor Street, Chicago, IL 60607-7061

#### Index of Contents:

|                     |        |
|---------------------|--------|
| I. NMR Spectra..... | S2–S15 |
|---------------------|--------|

<sup>1</sup>H NMR

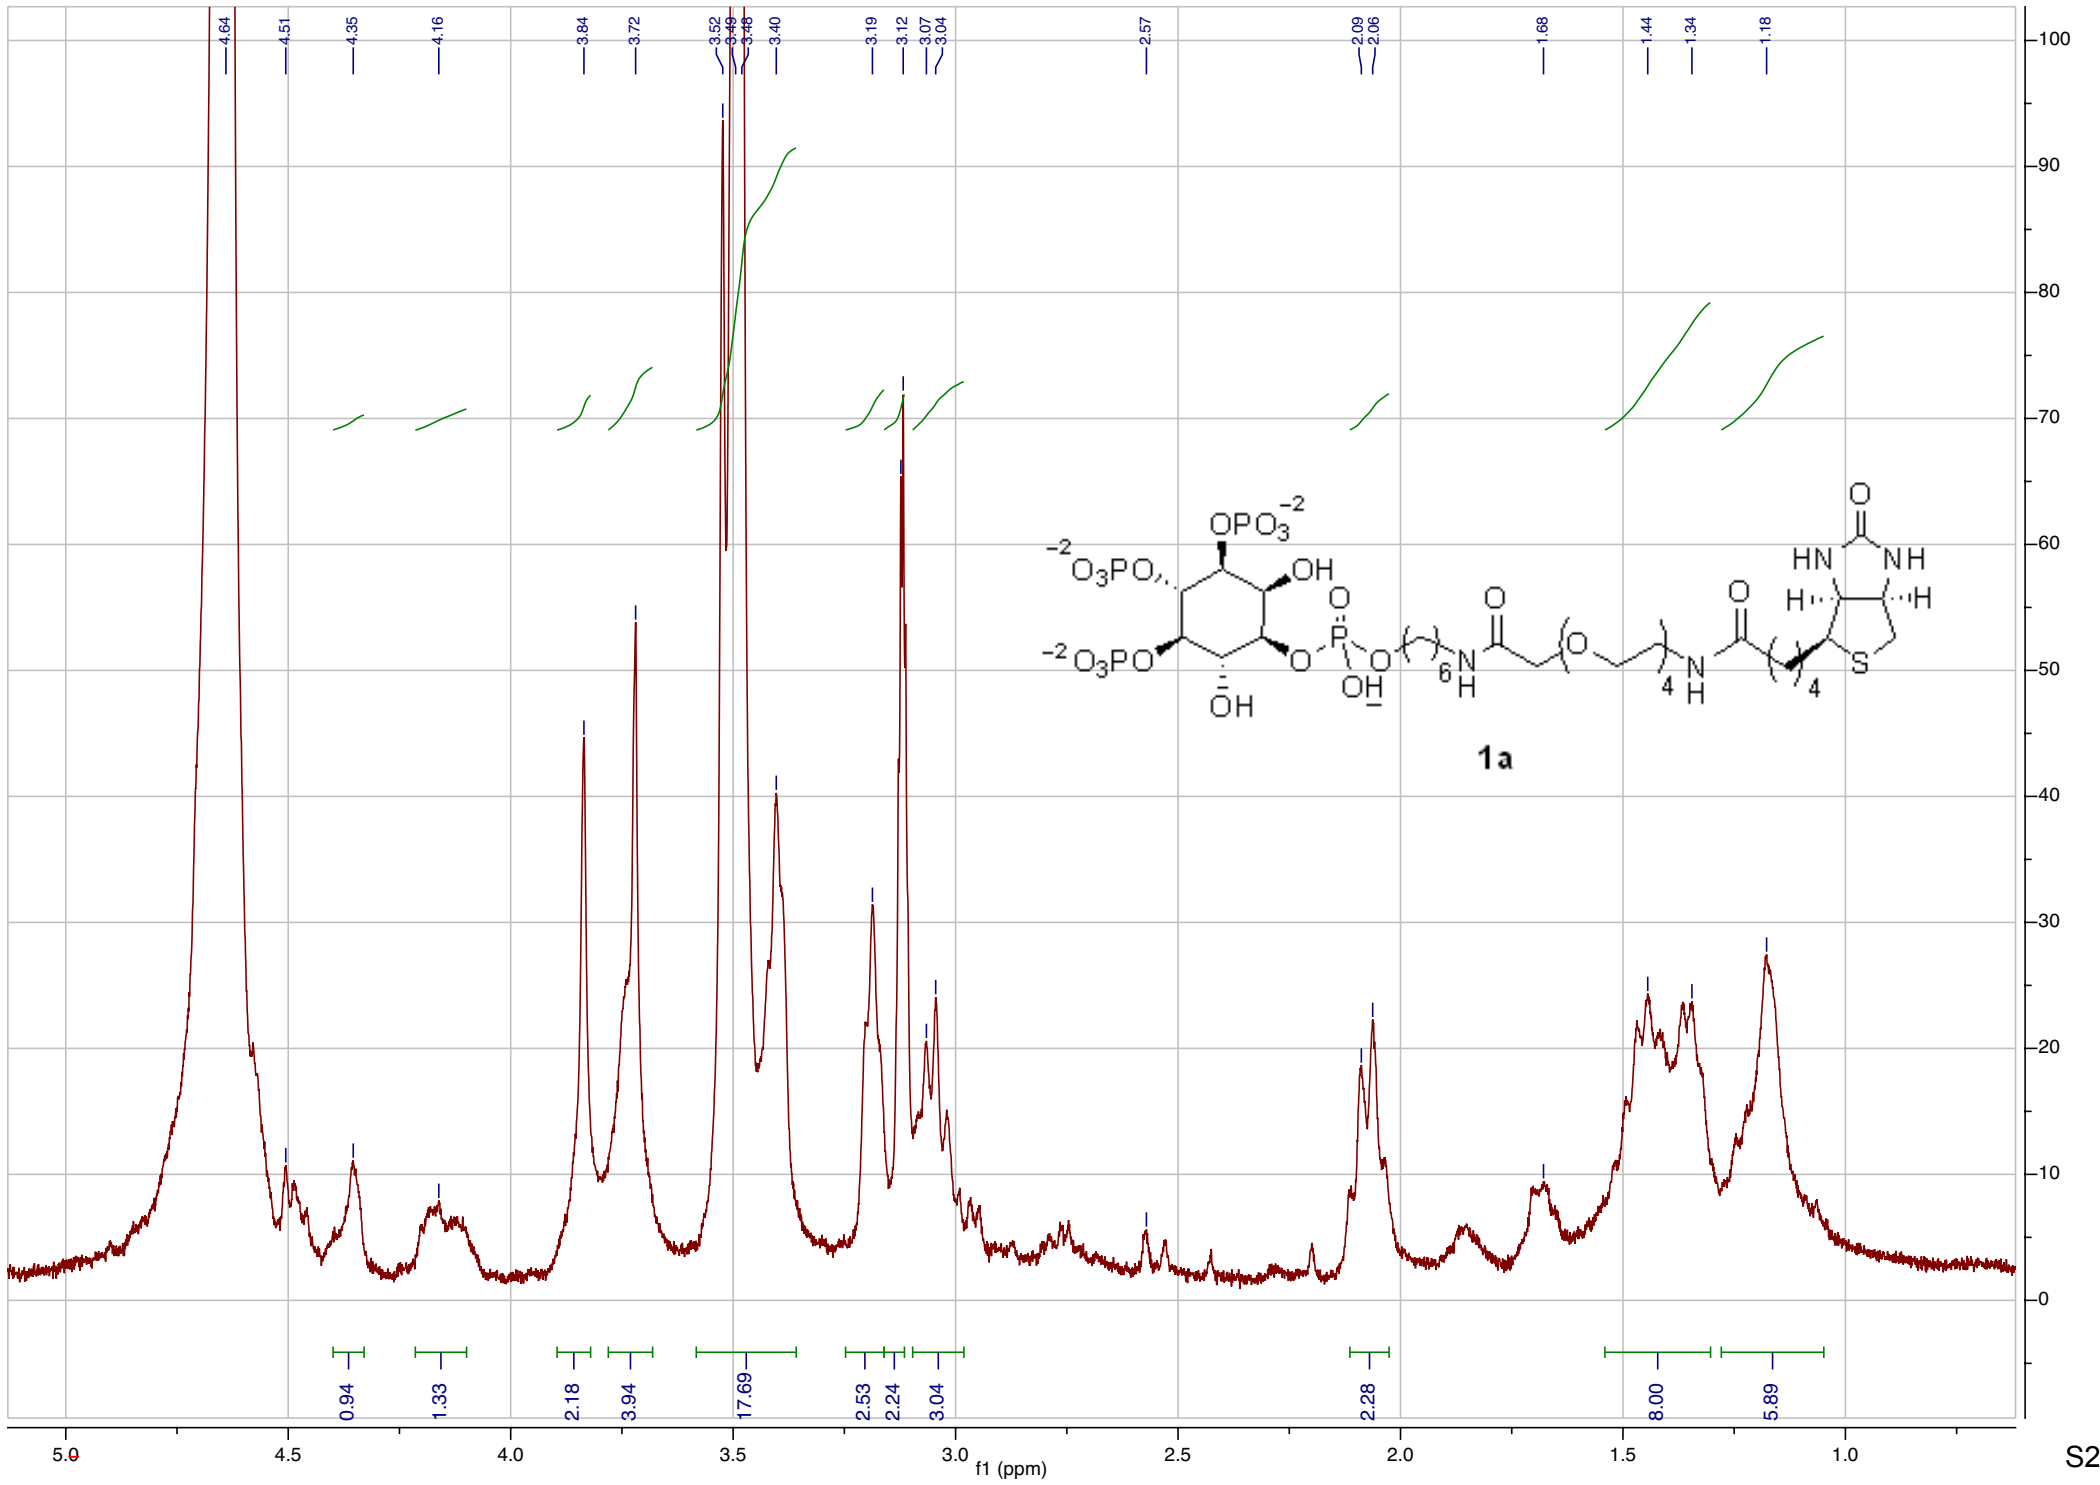

<sup>31</sup>P NMR

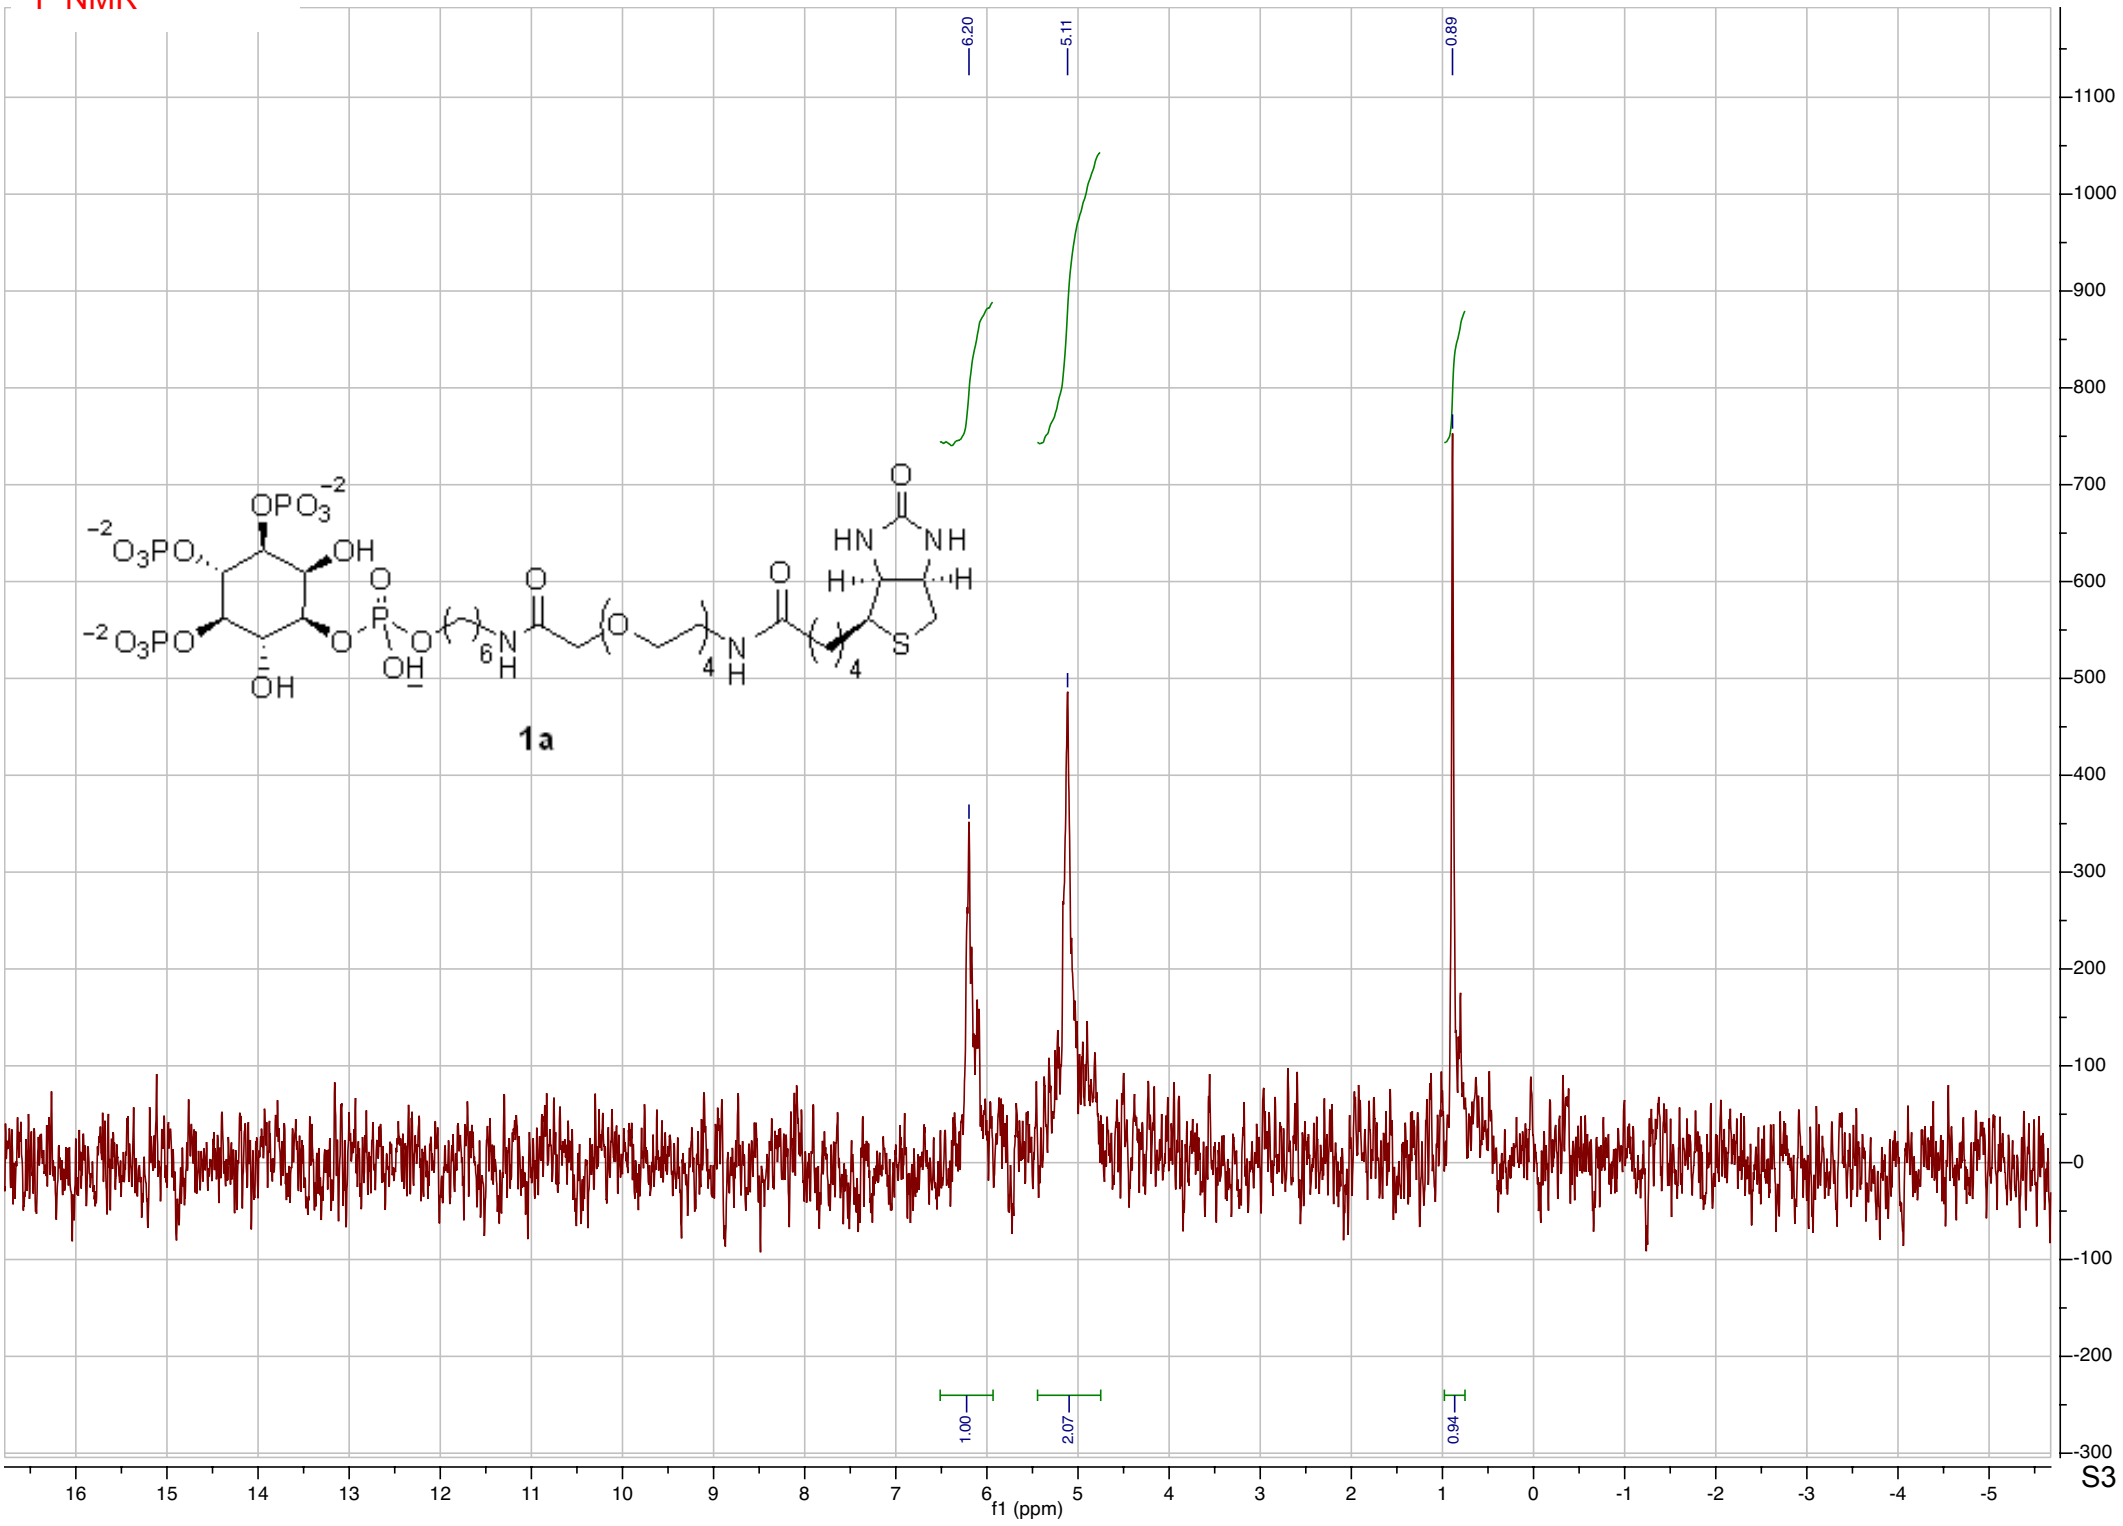

S3

# <sup>1</sup>H NMR

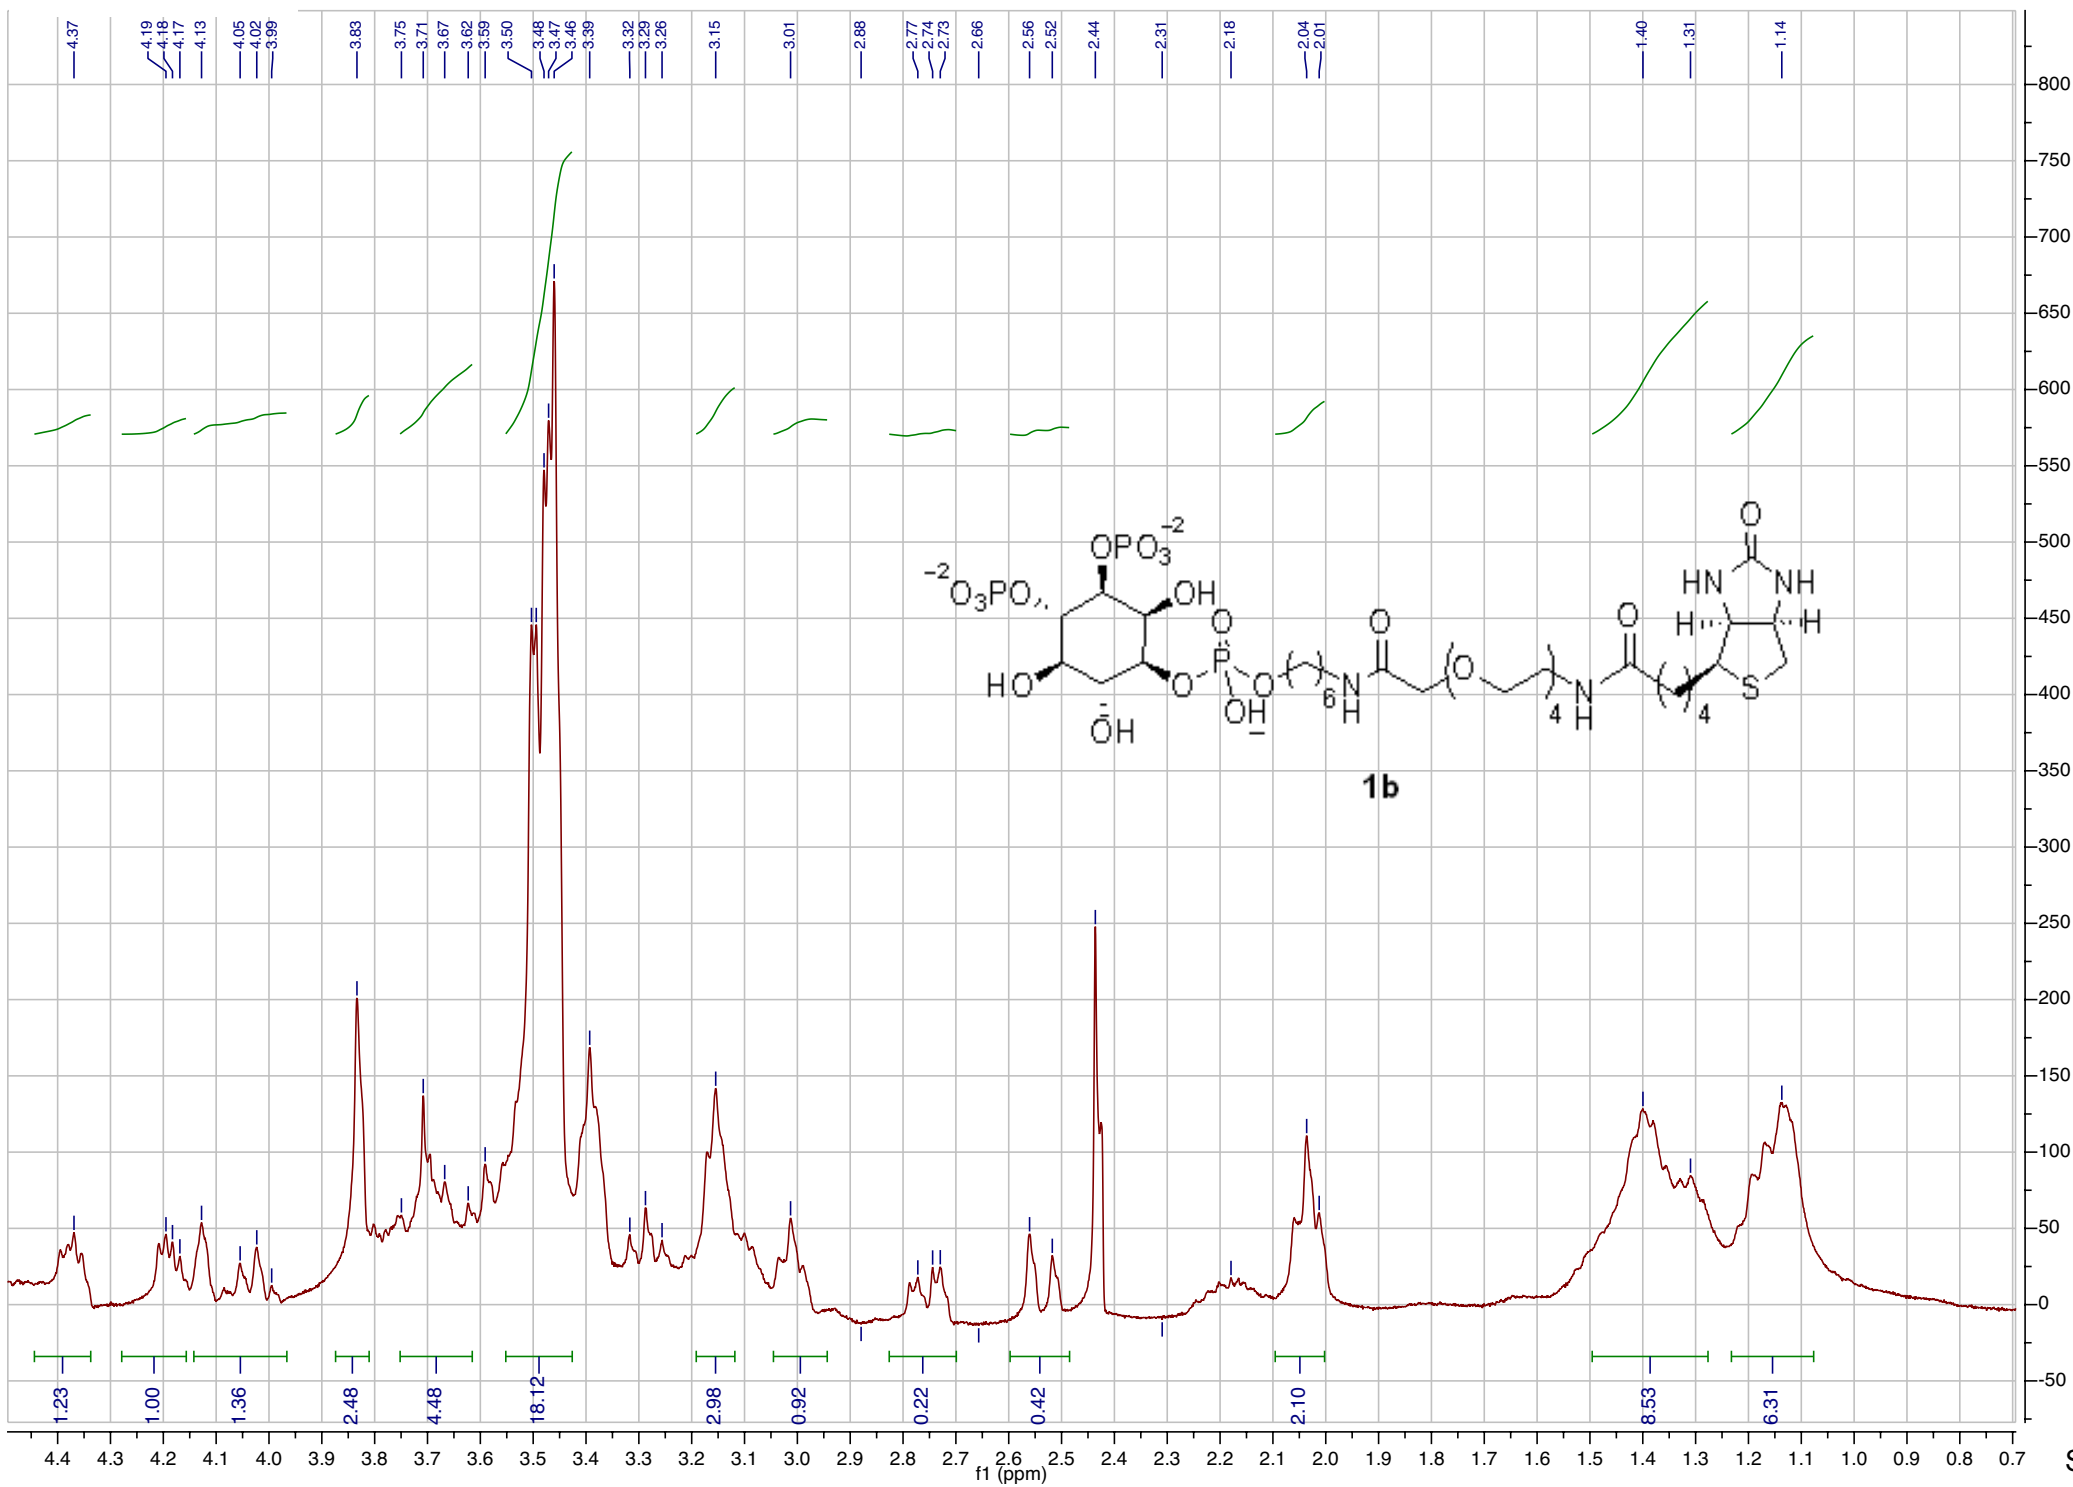

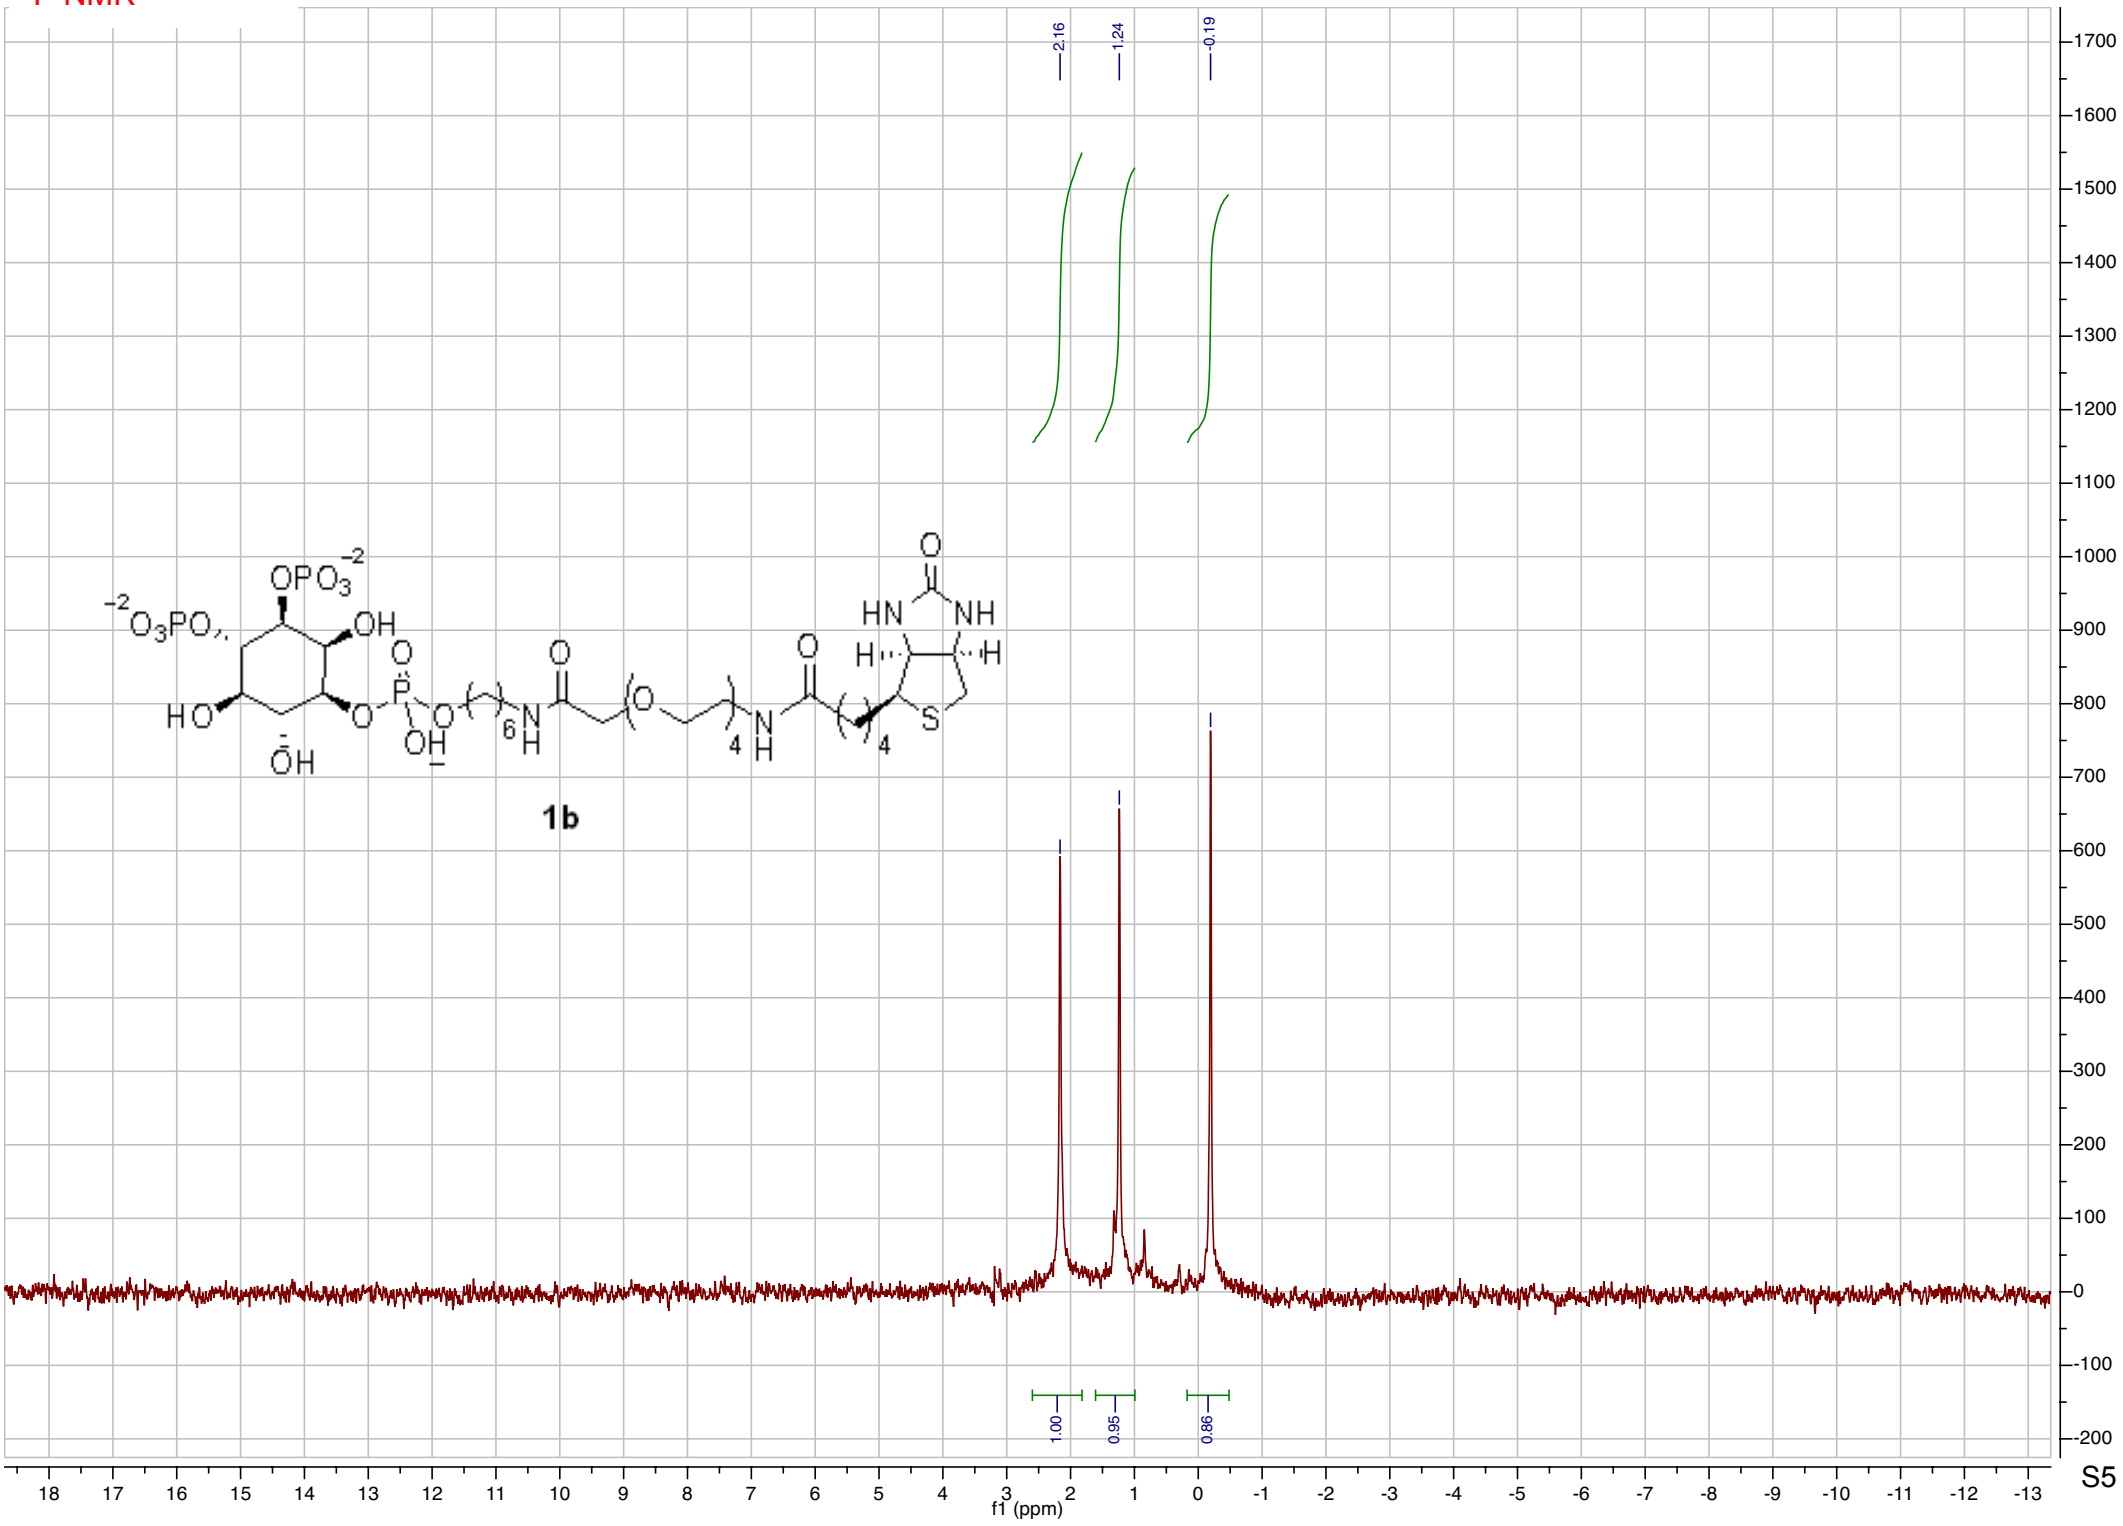

# <sup>1</sup>H NMR

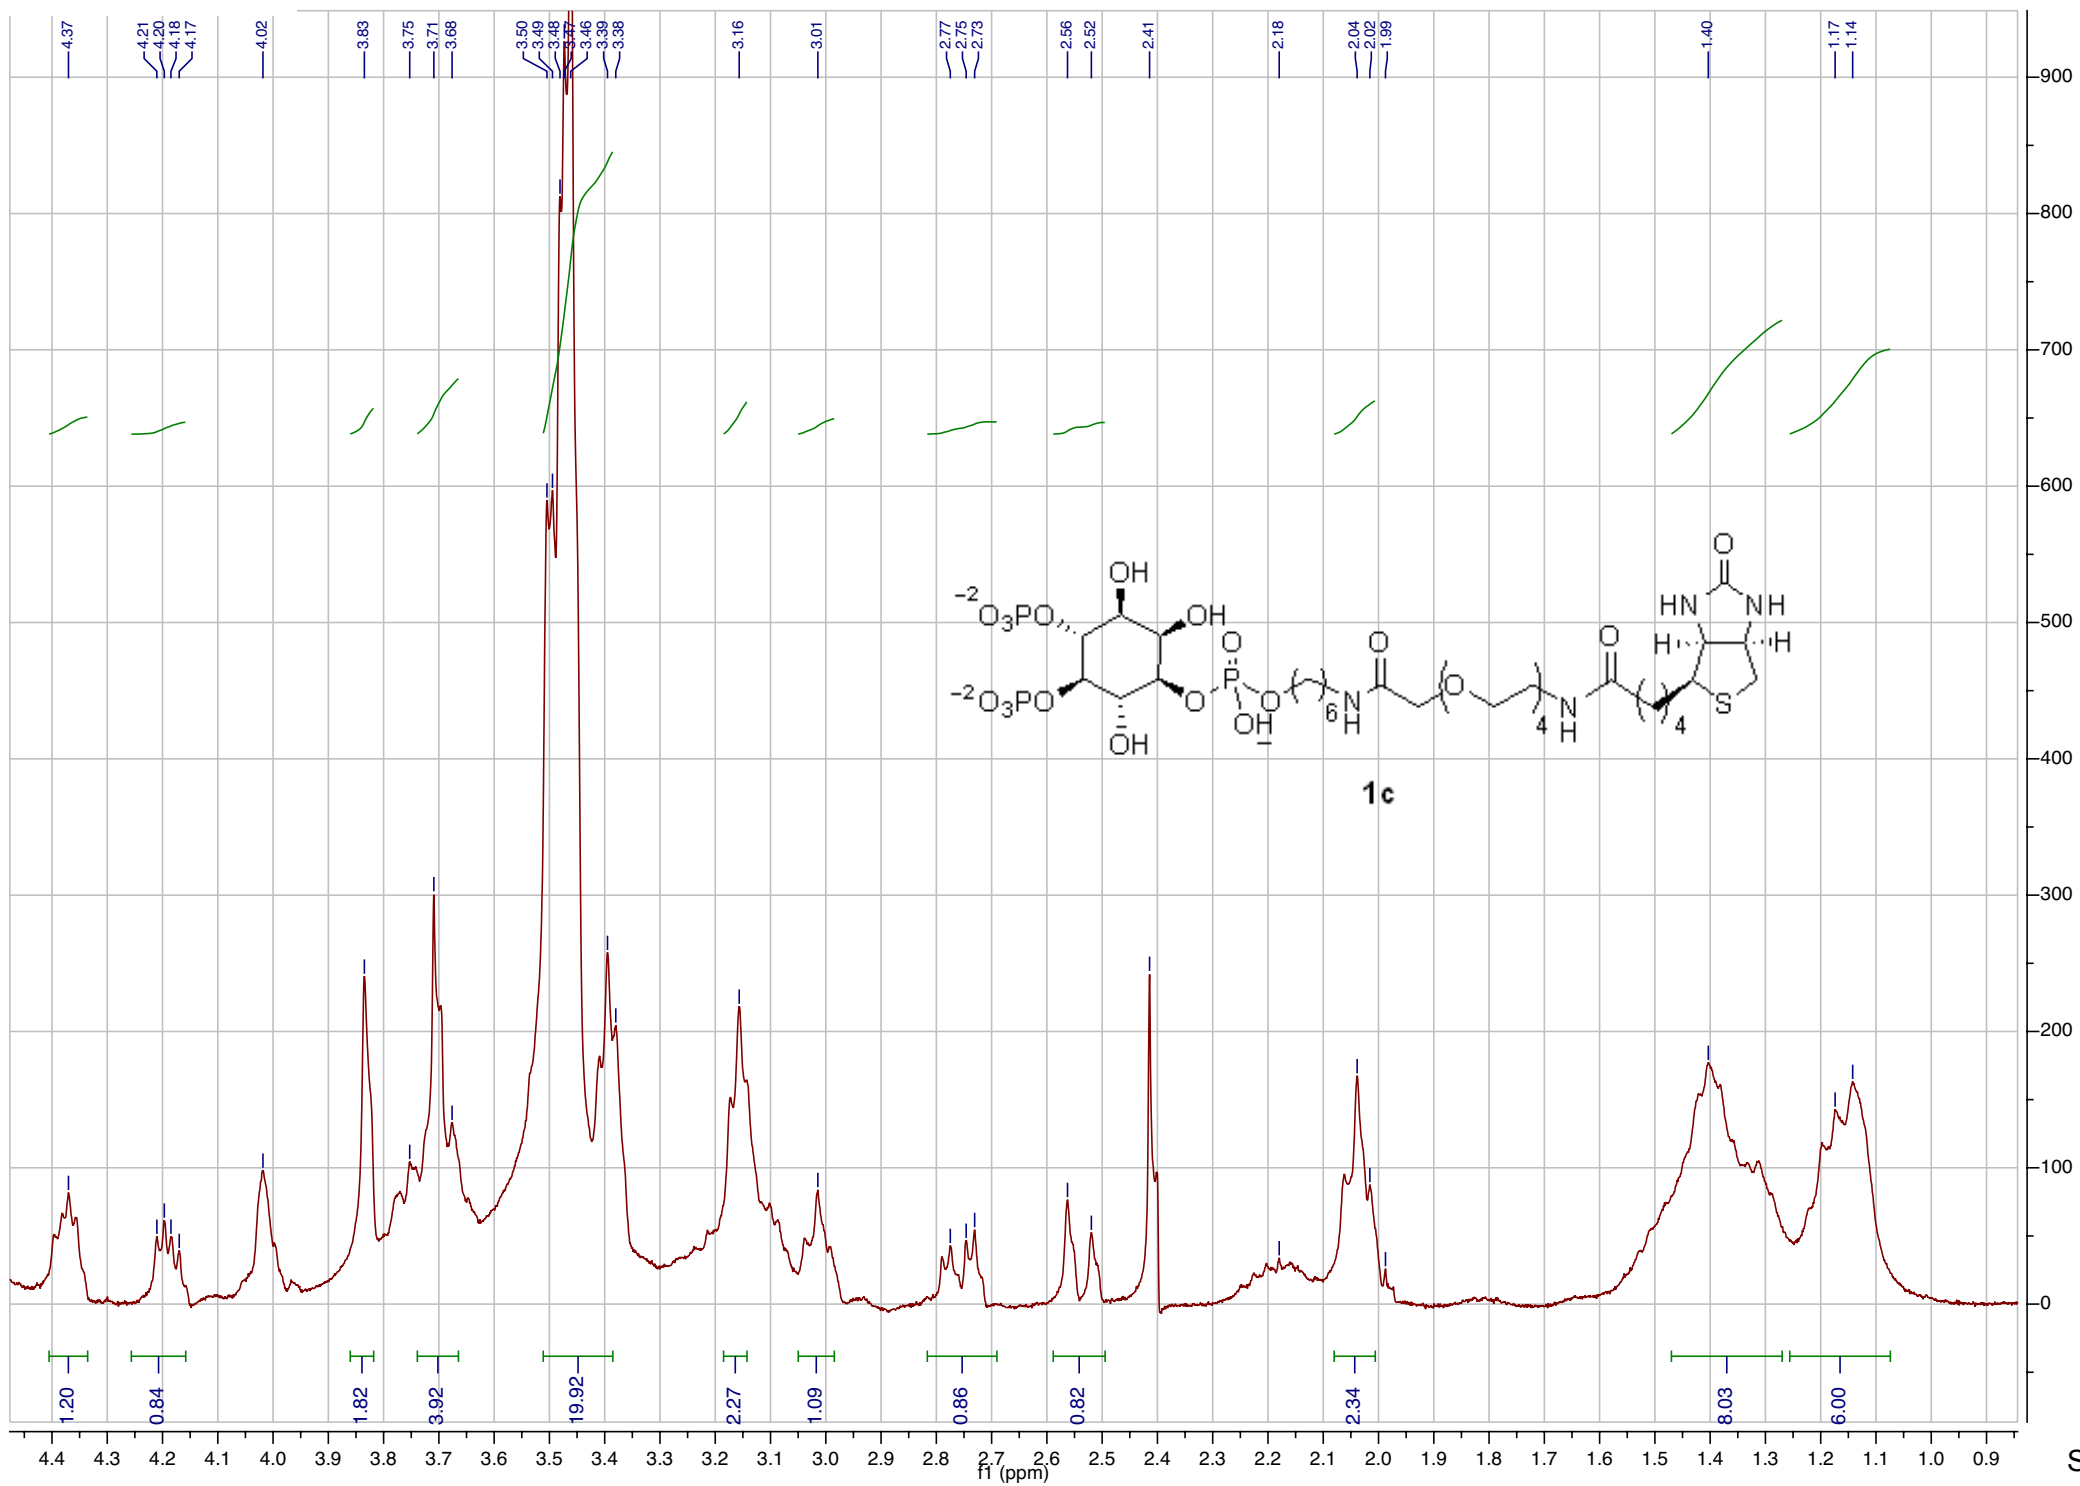

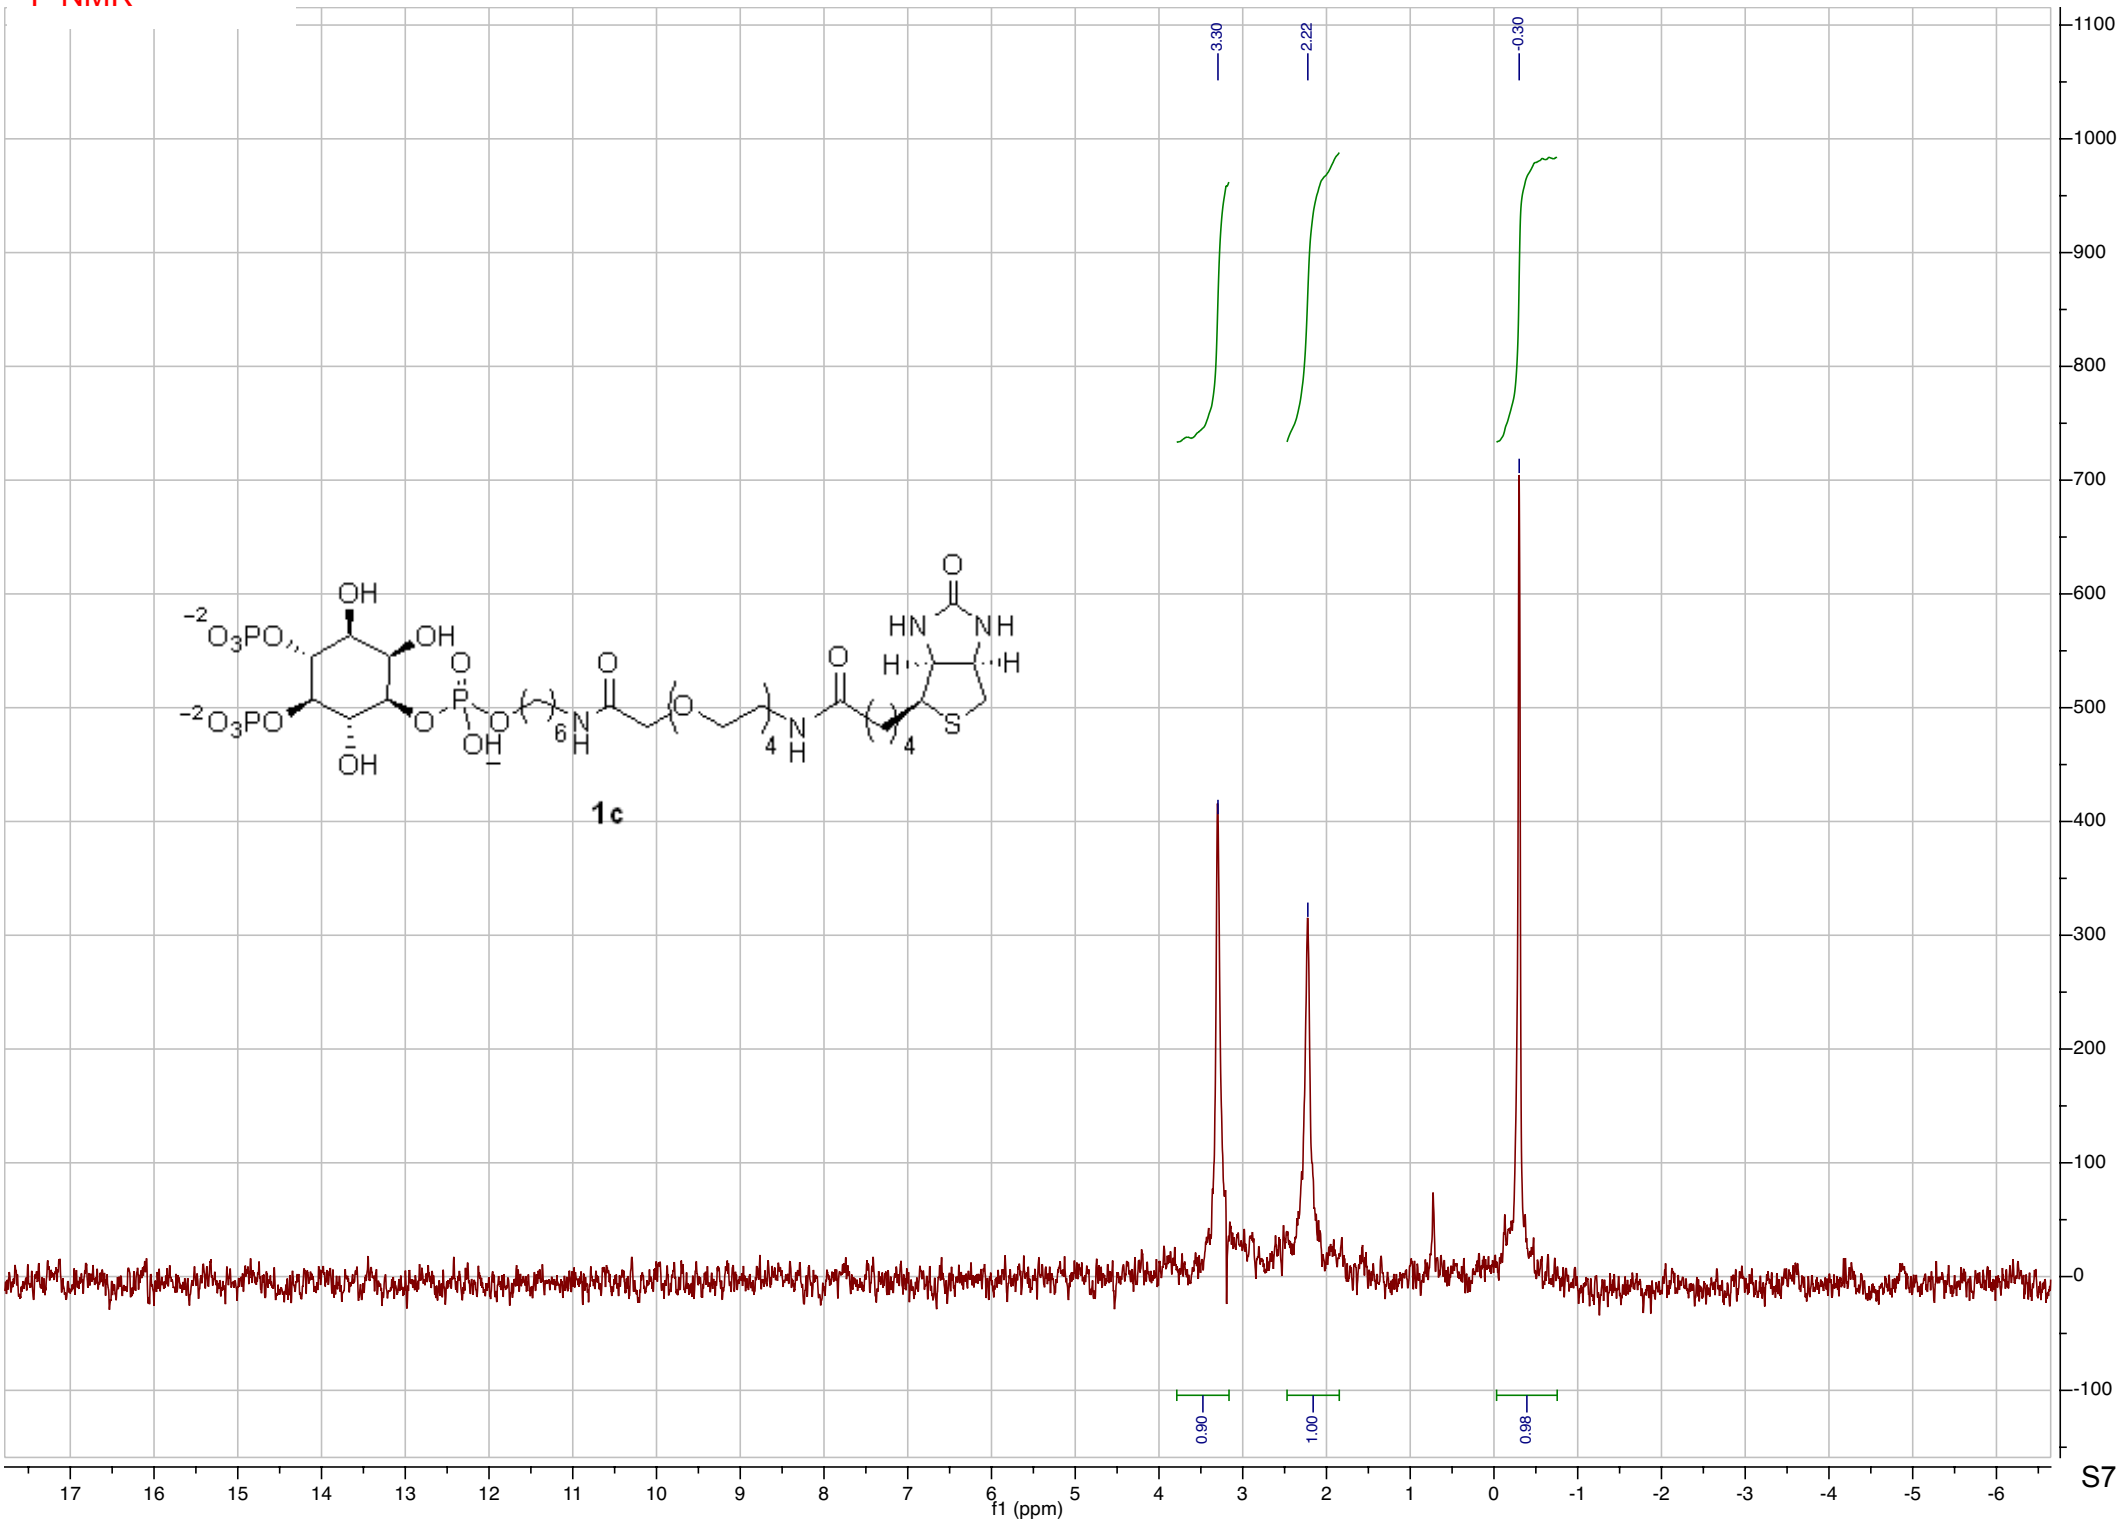

# <sup>1</sup>H NMR

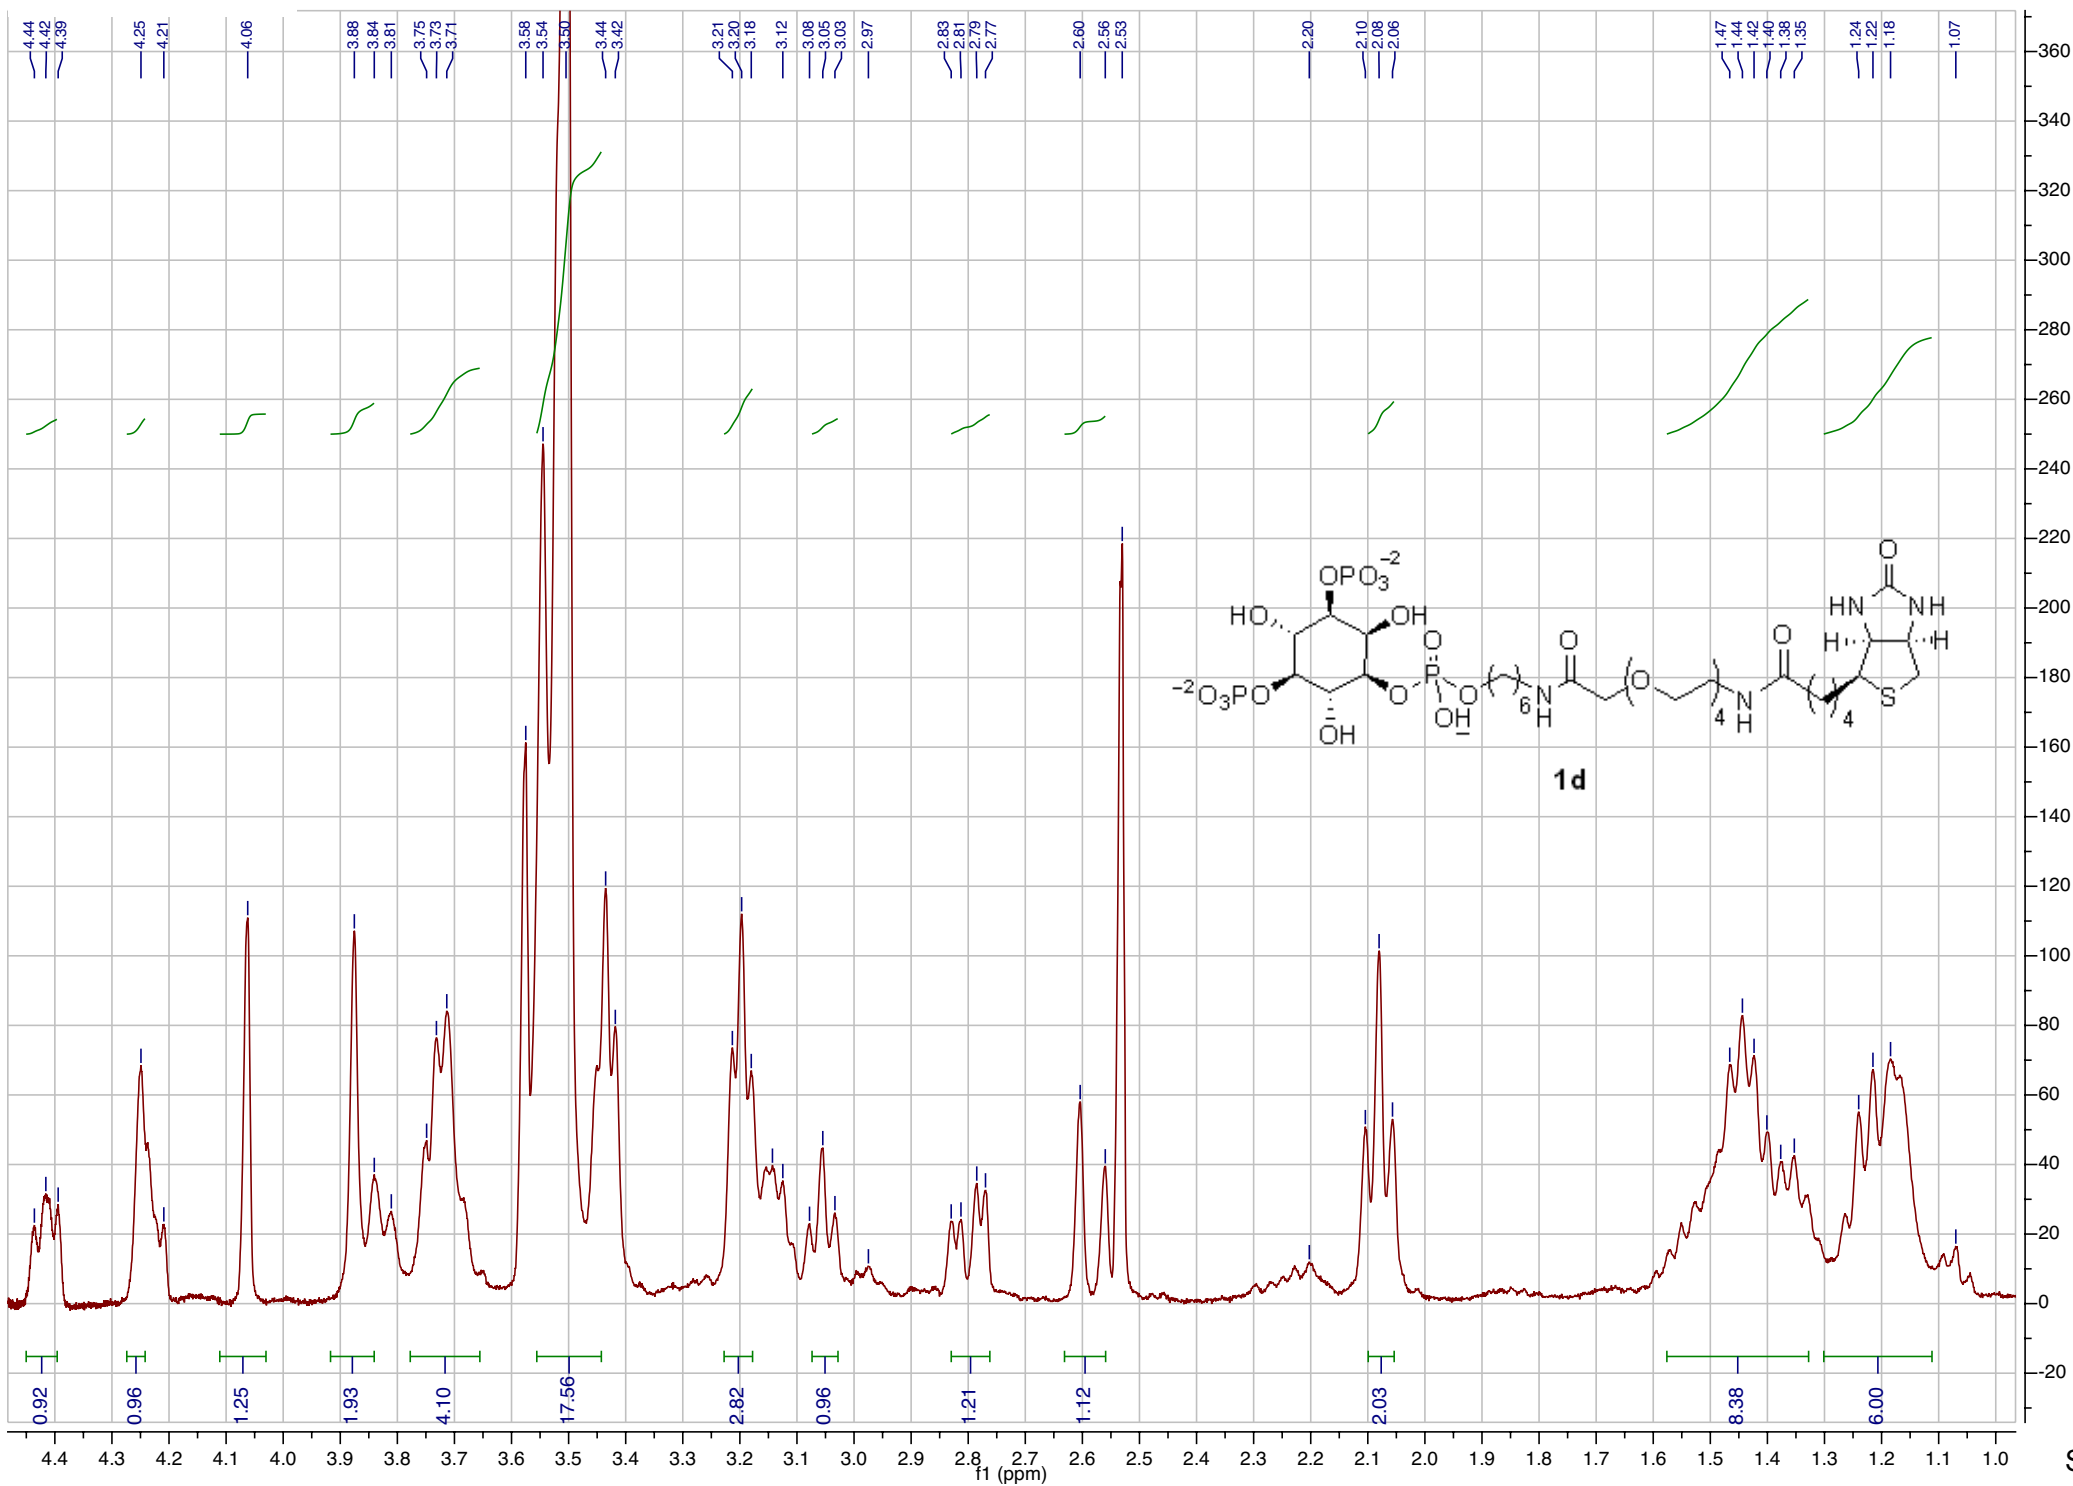



<sup>31</sup>P NMR

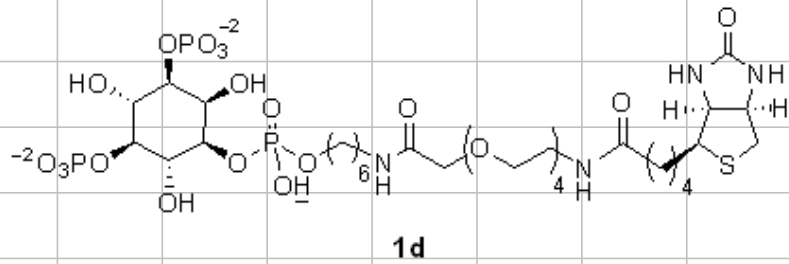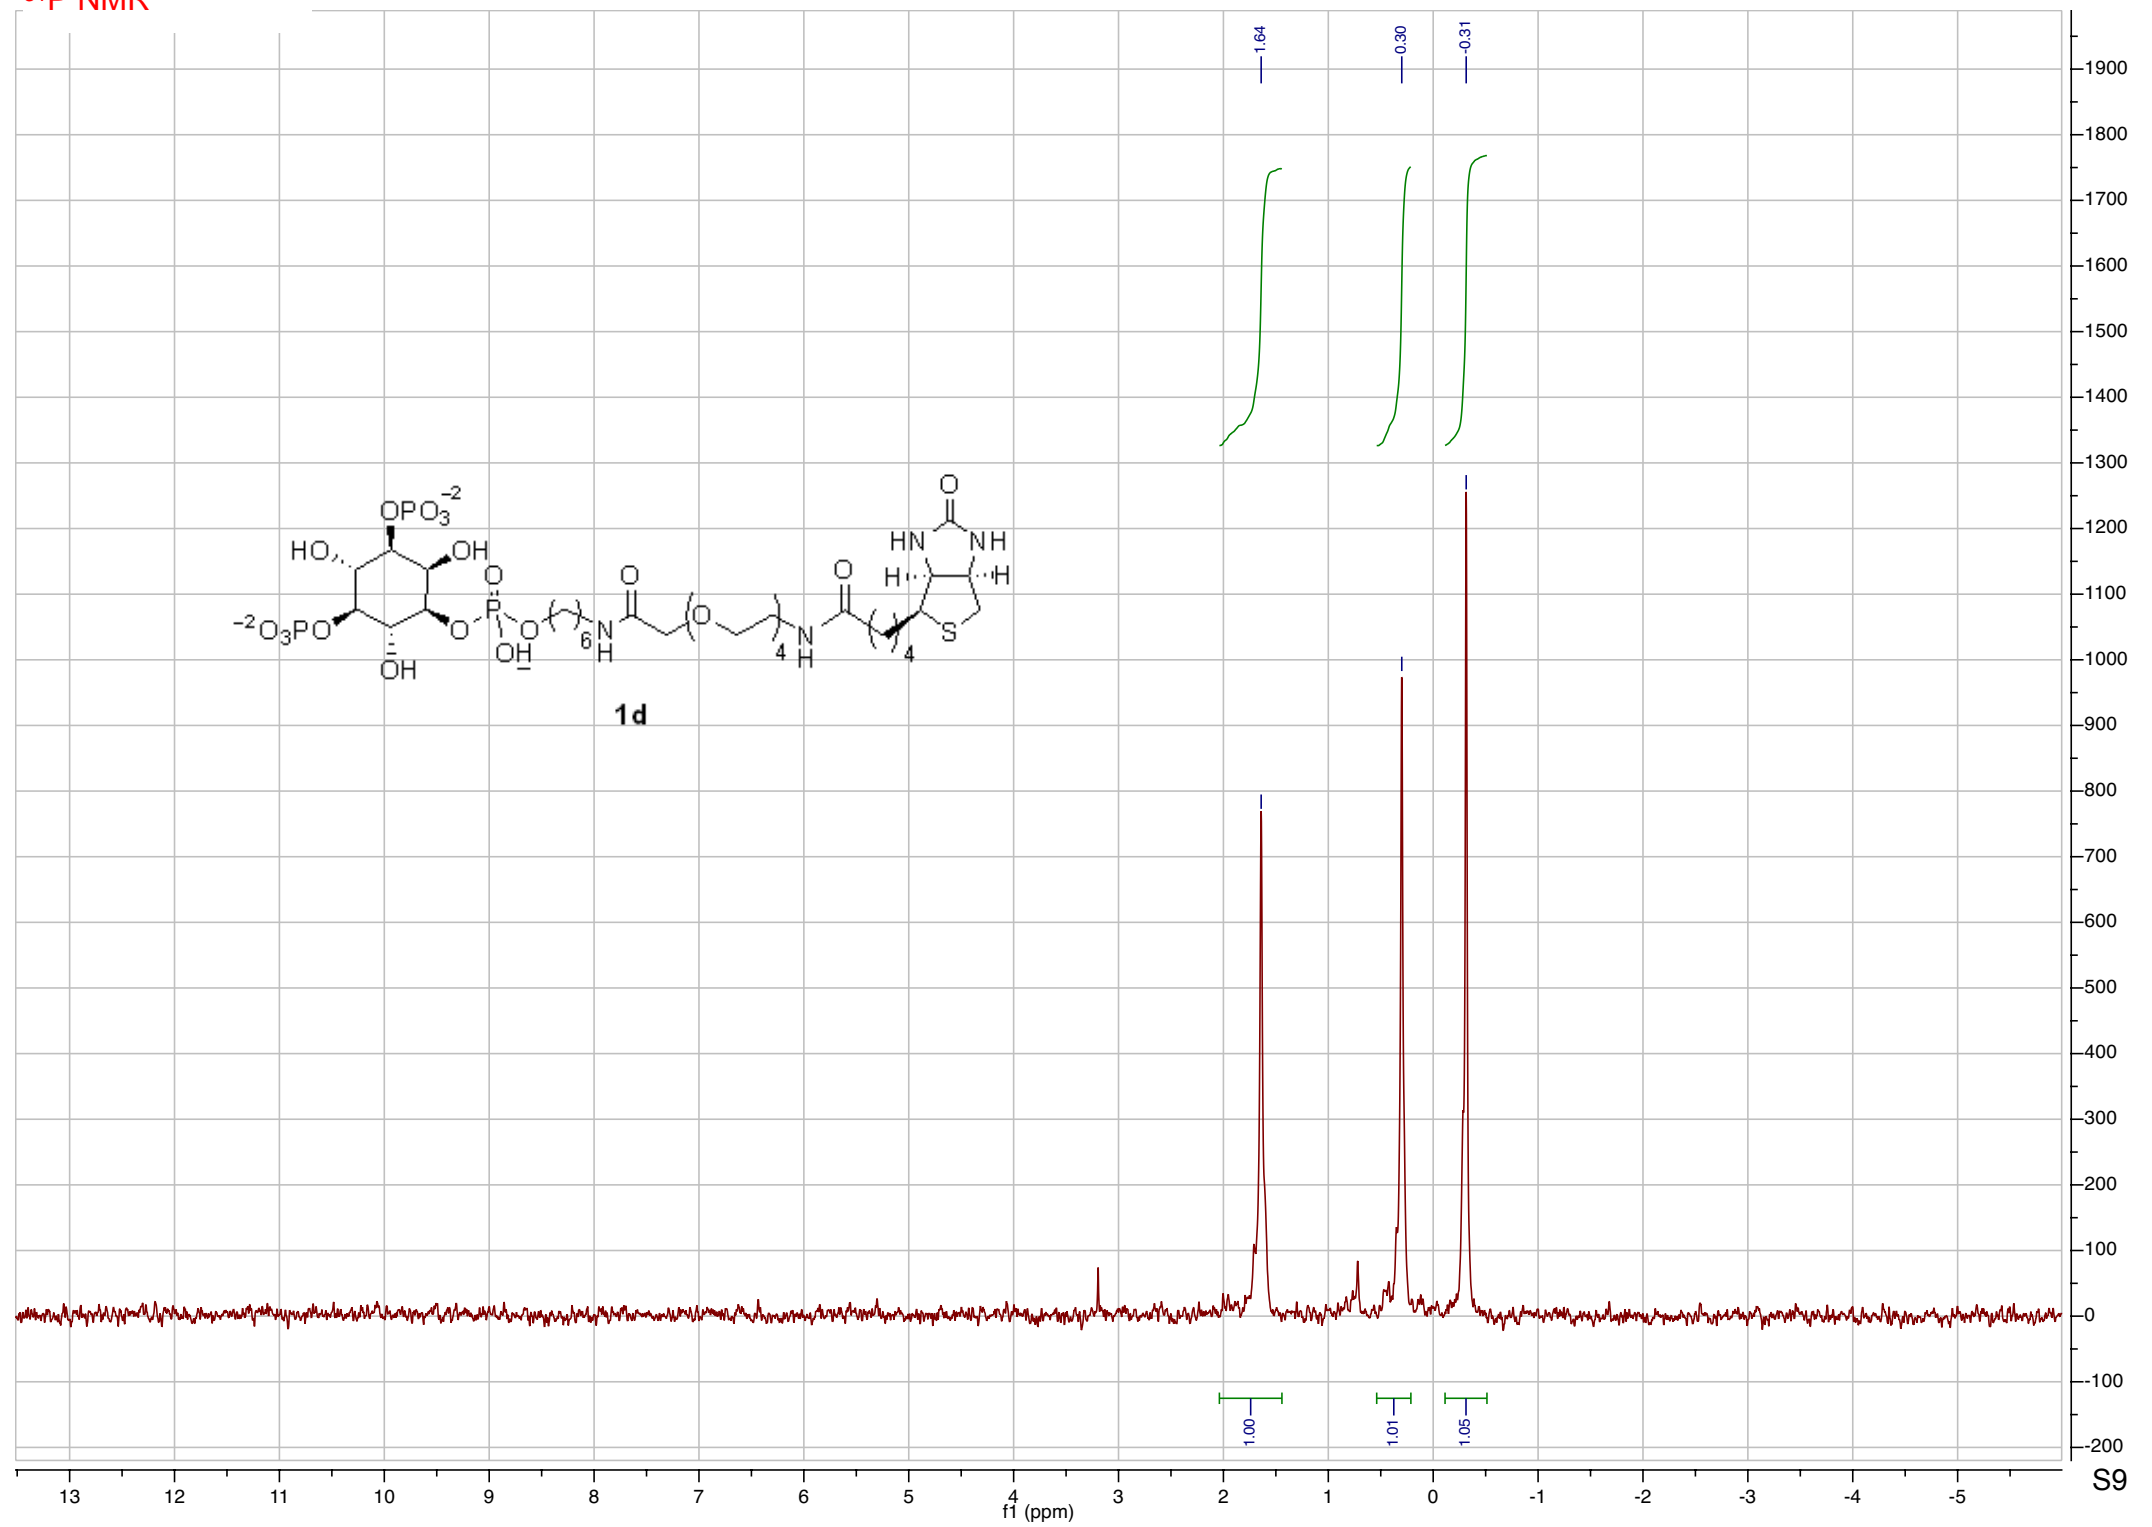

<sup>1</sup>H NMR

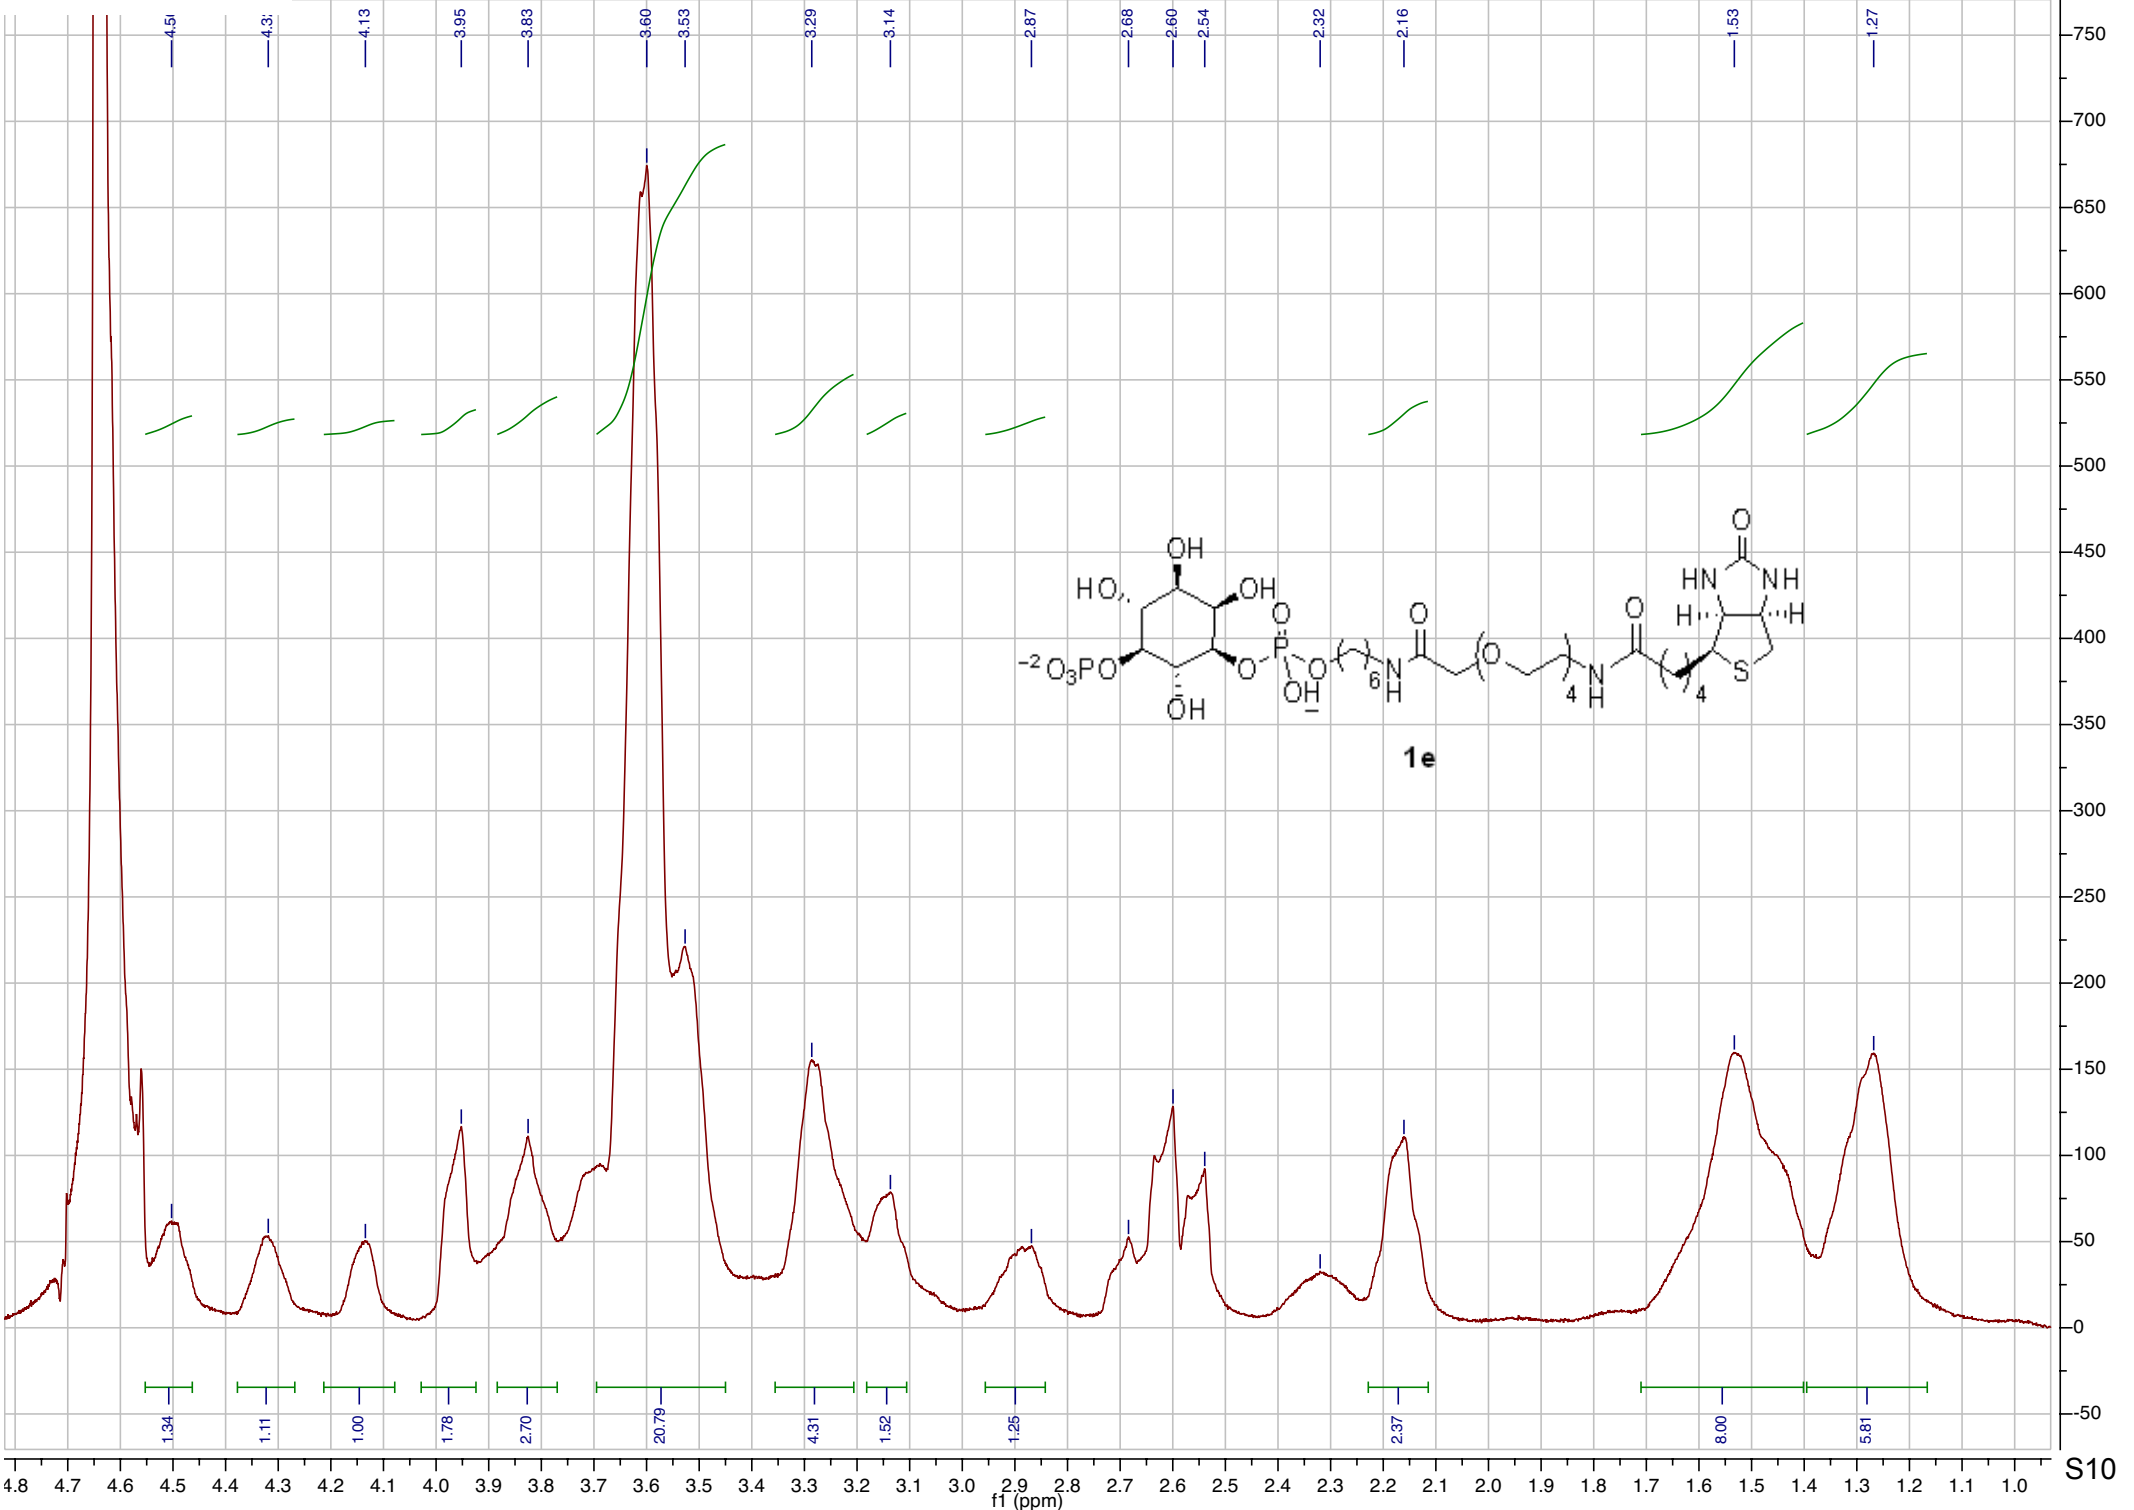

**<sup>31</sup>P NMR**

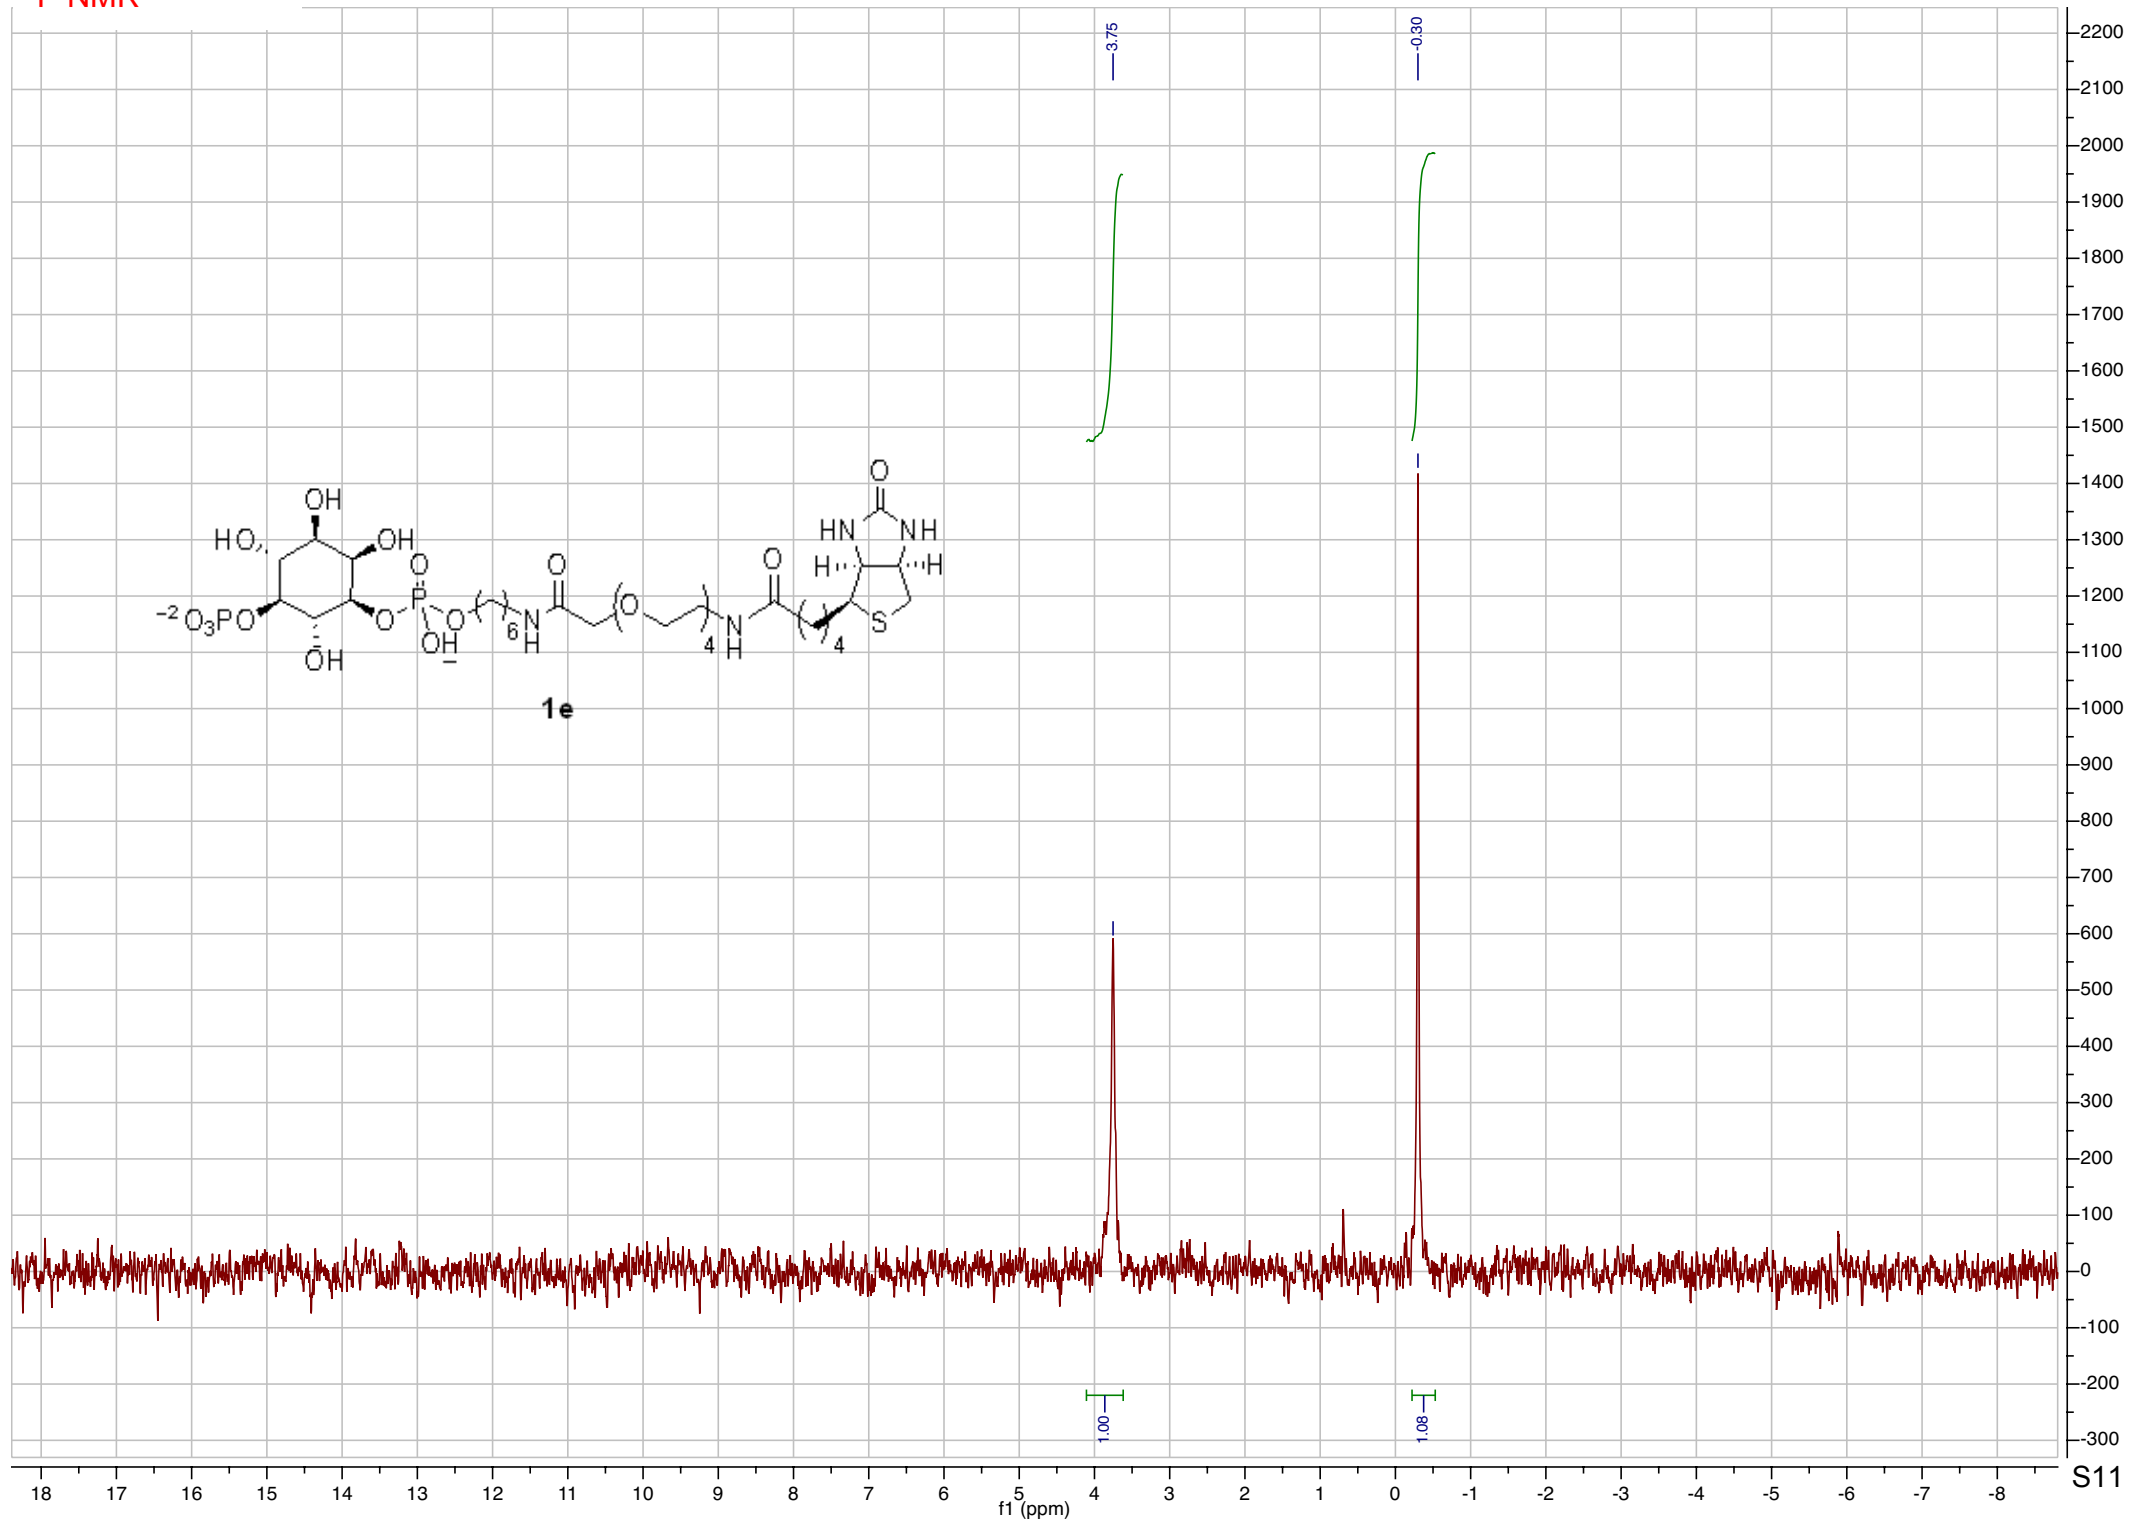

<sup>1</sup>H NMR

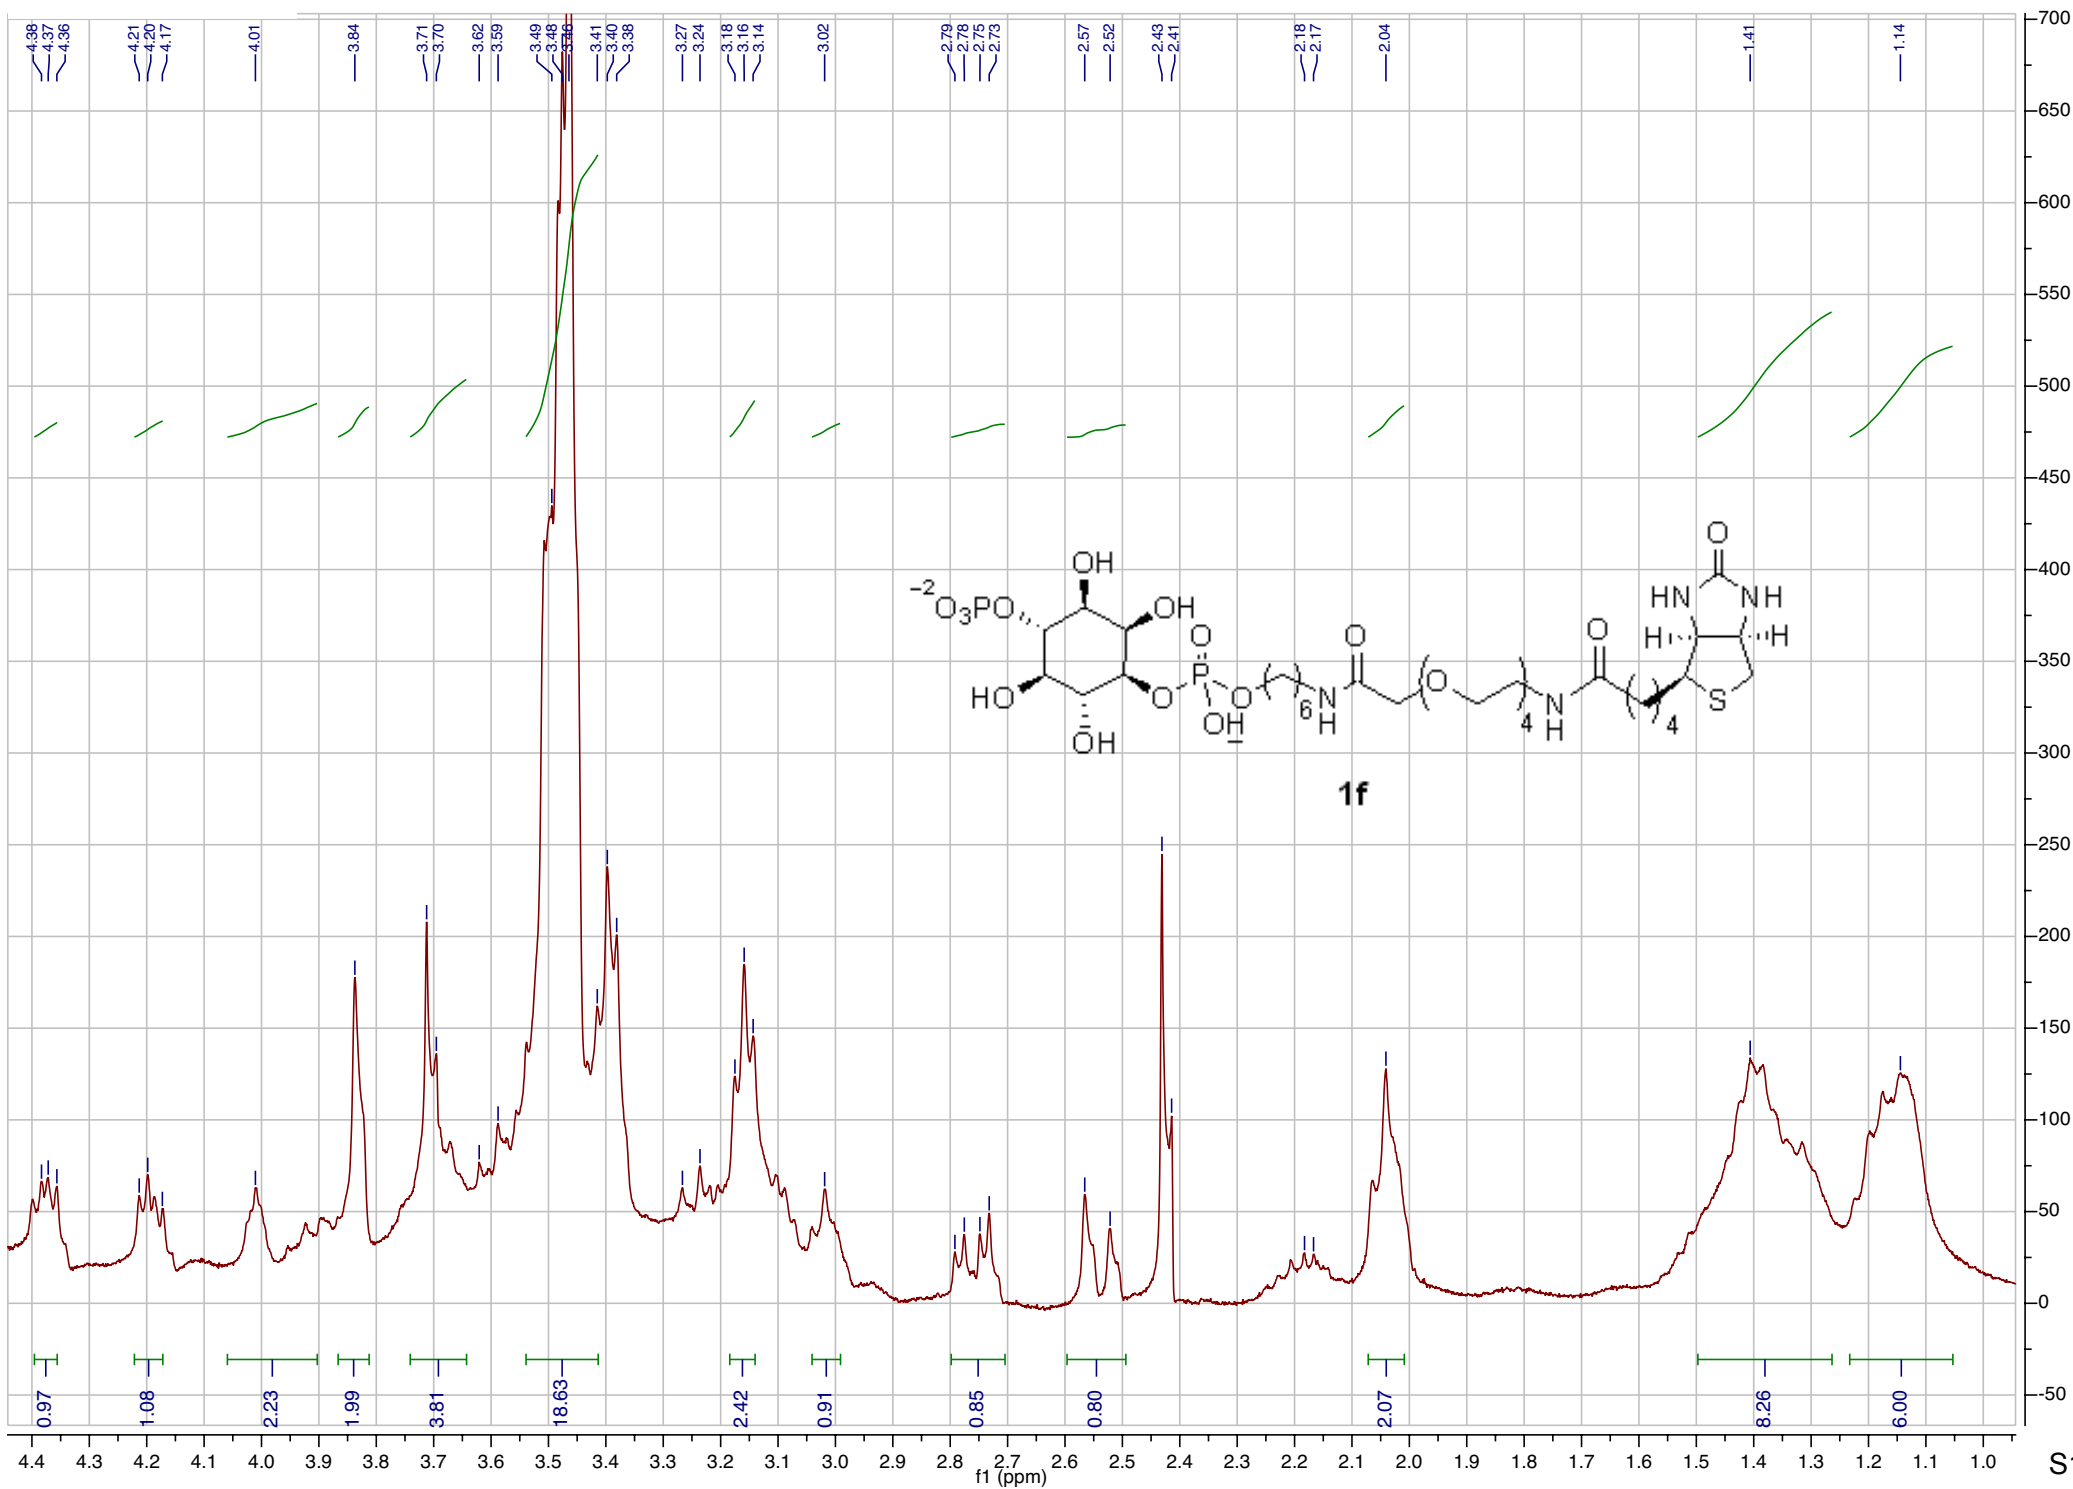

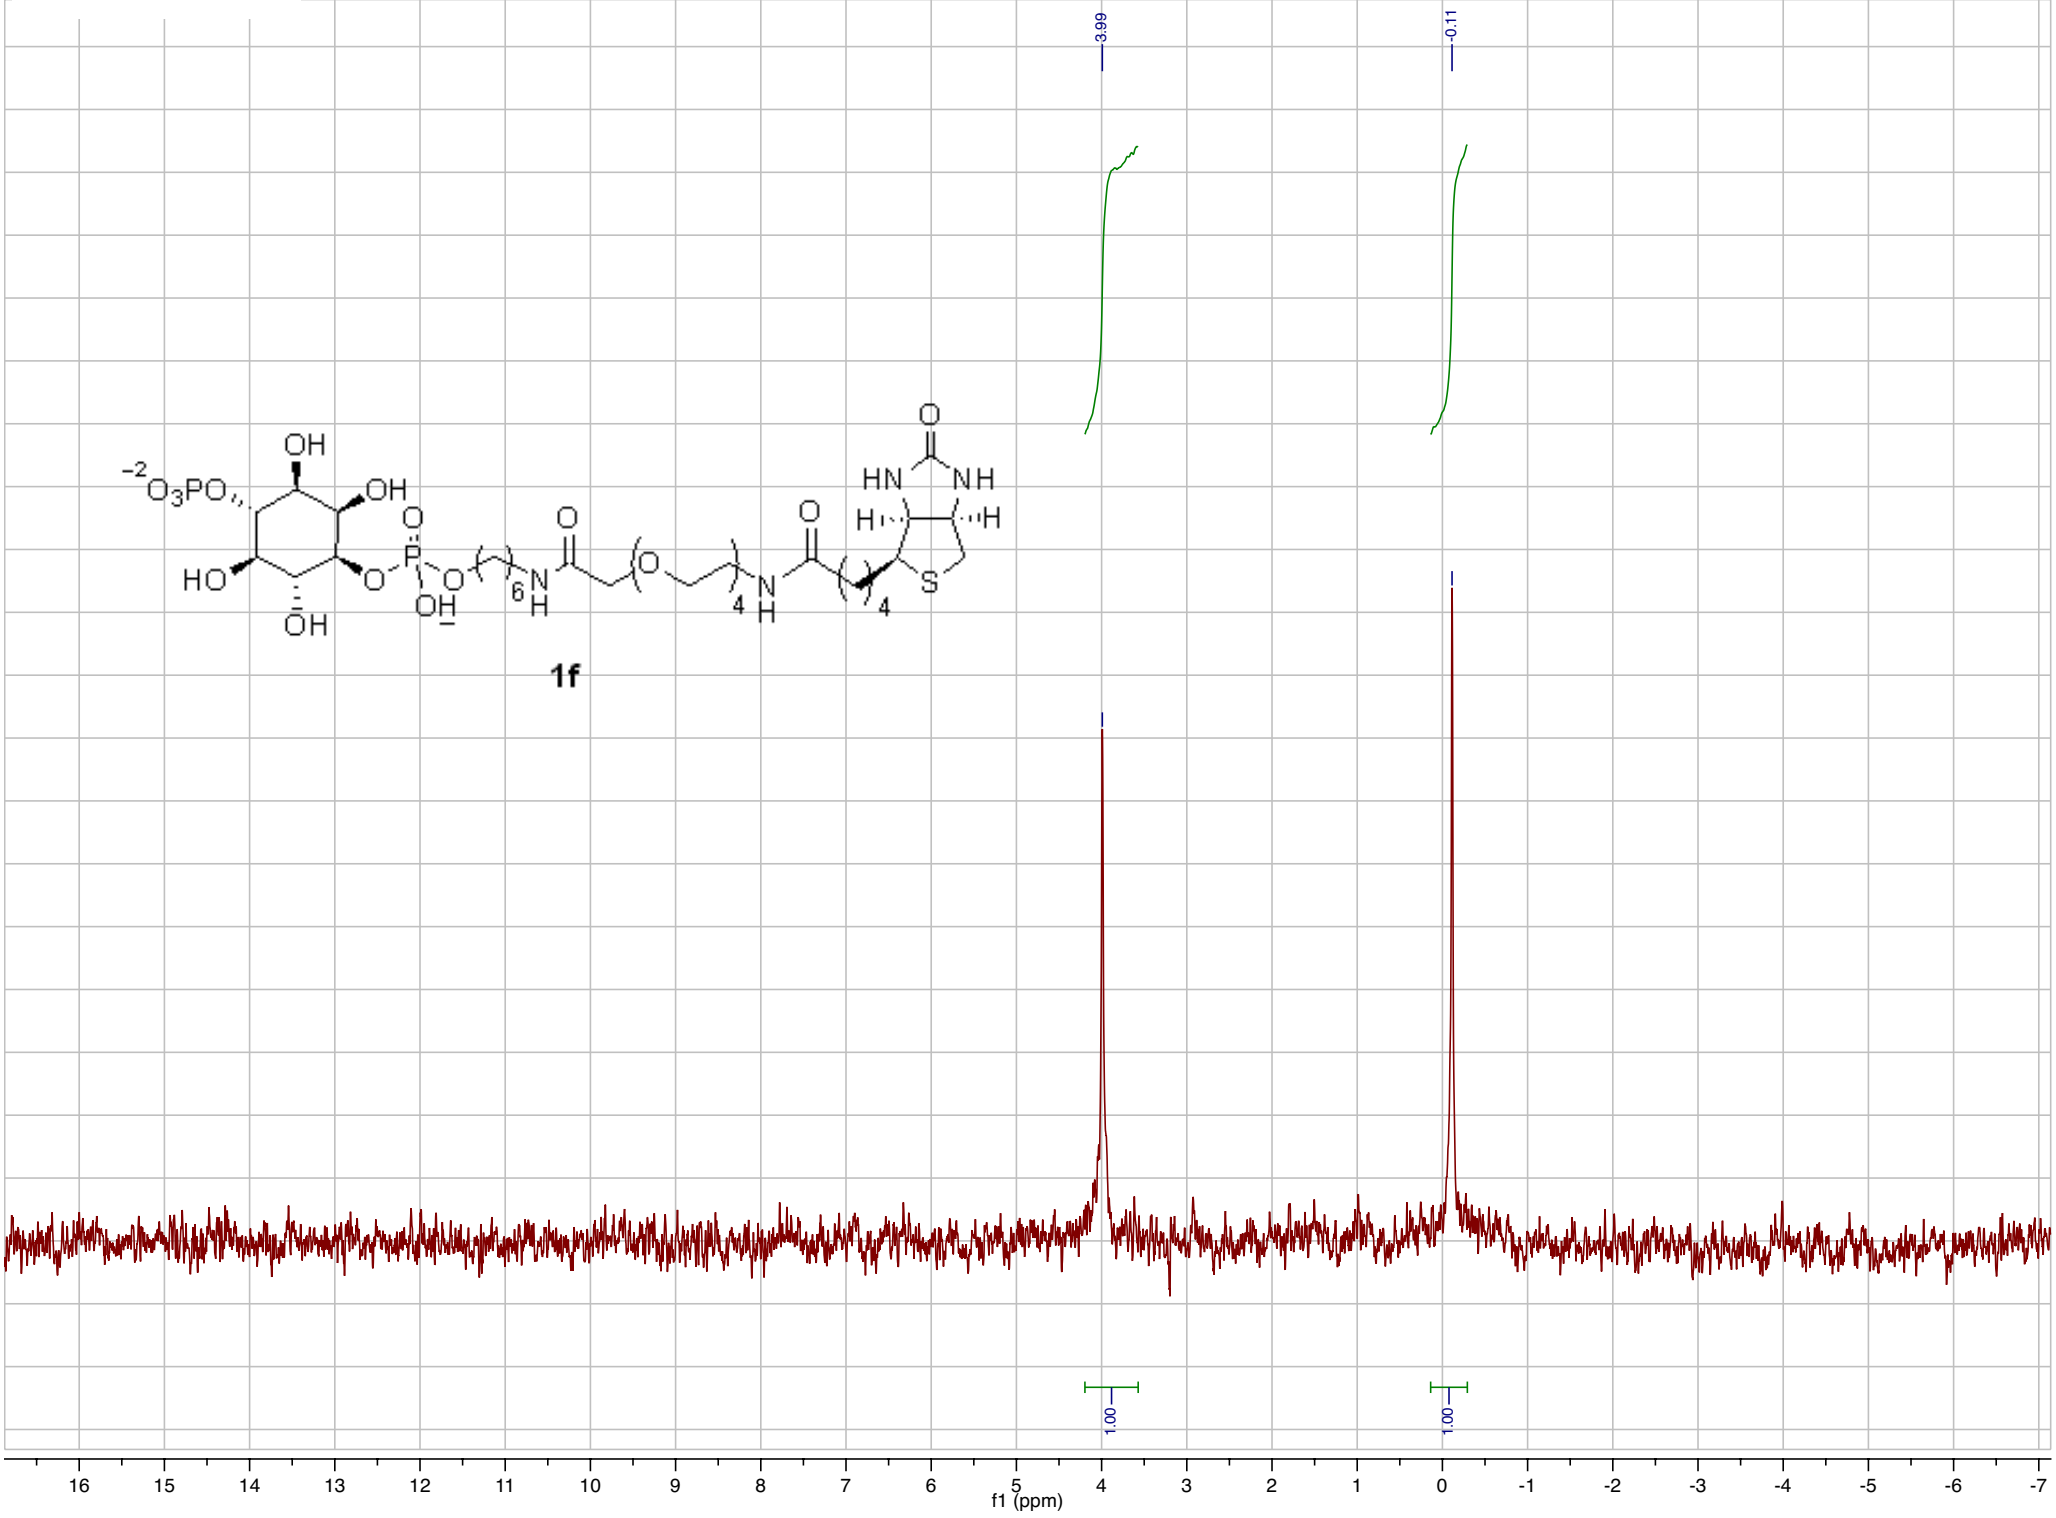

<sup>1</sup>H NMR

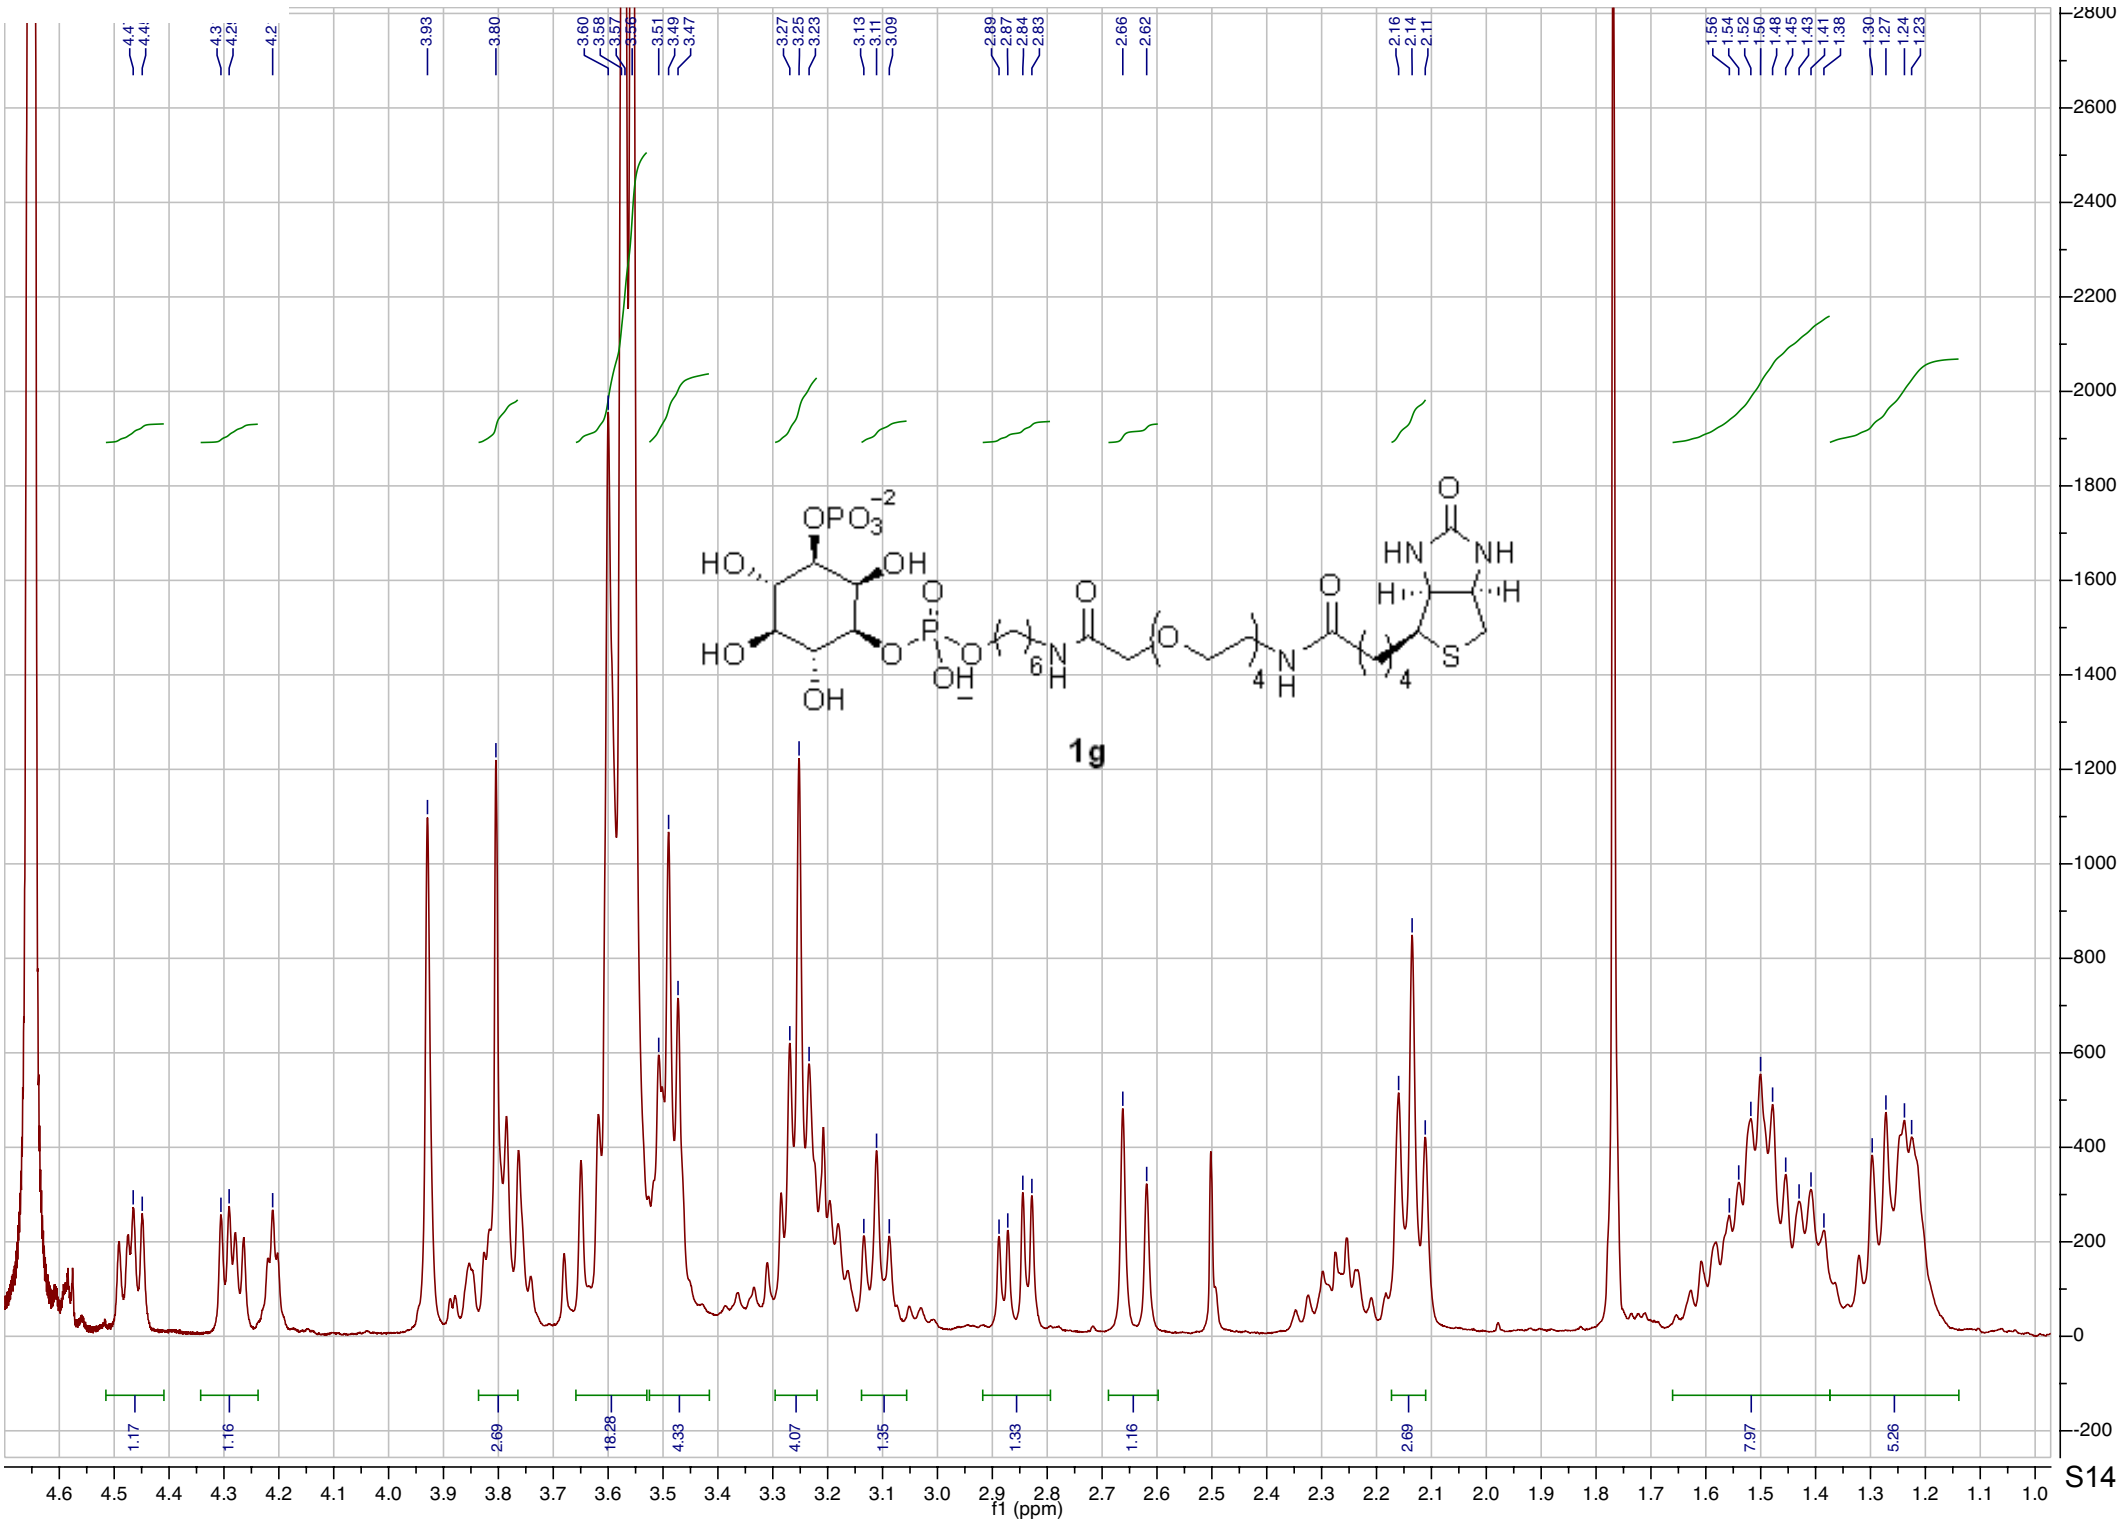

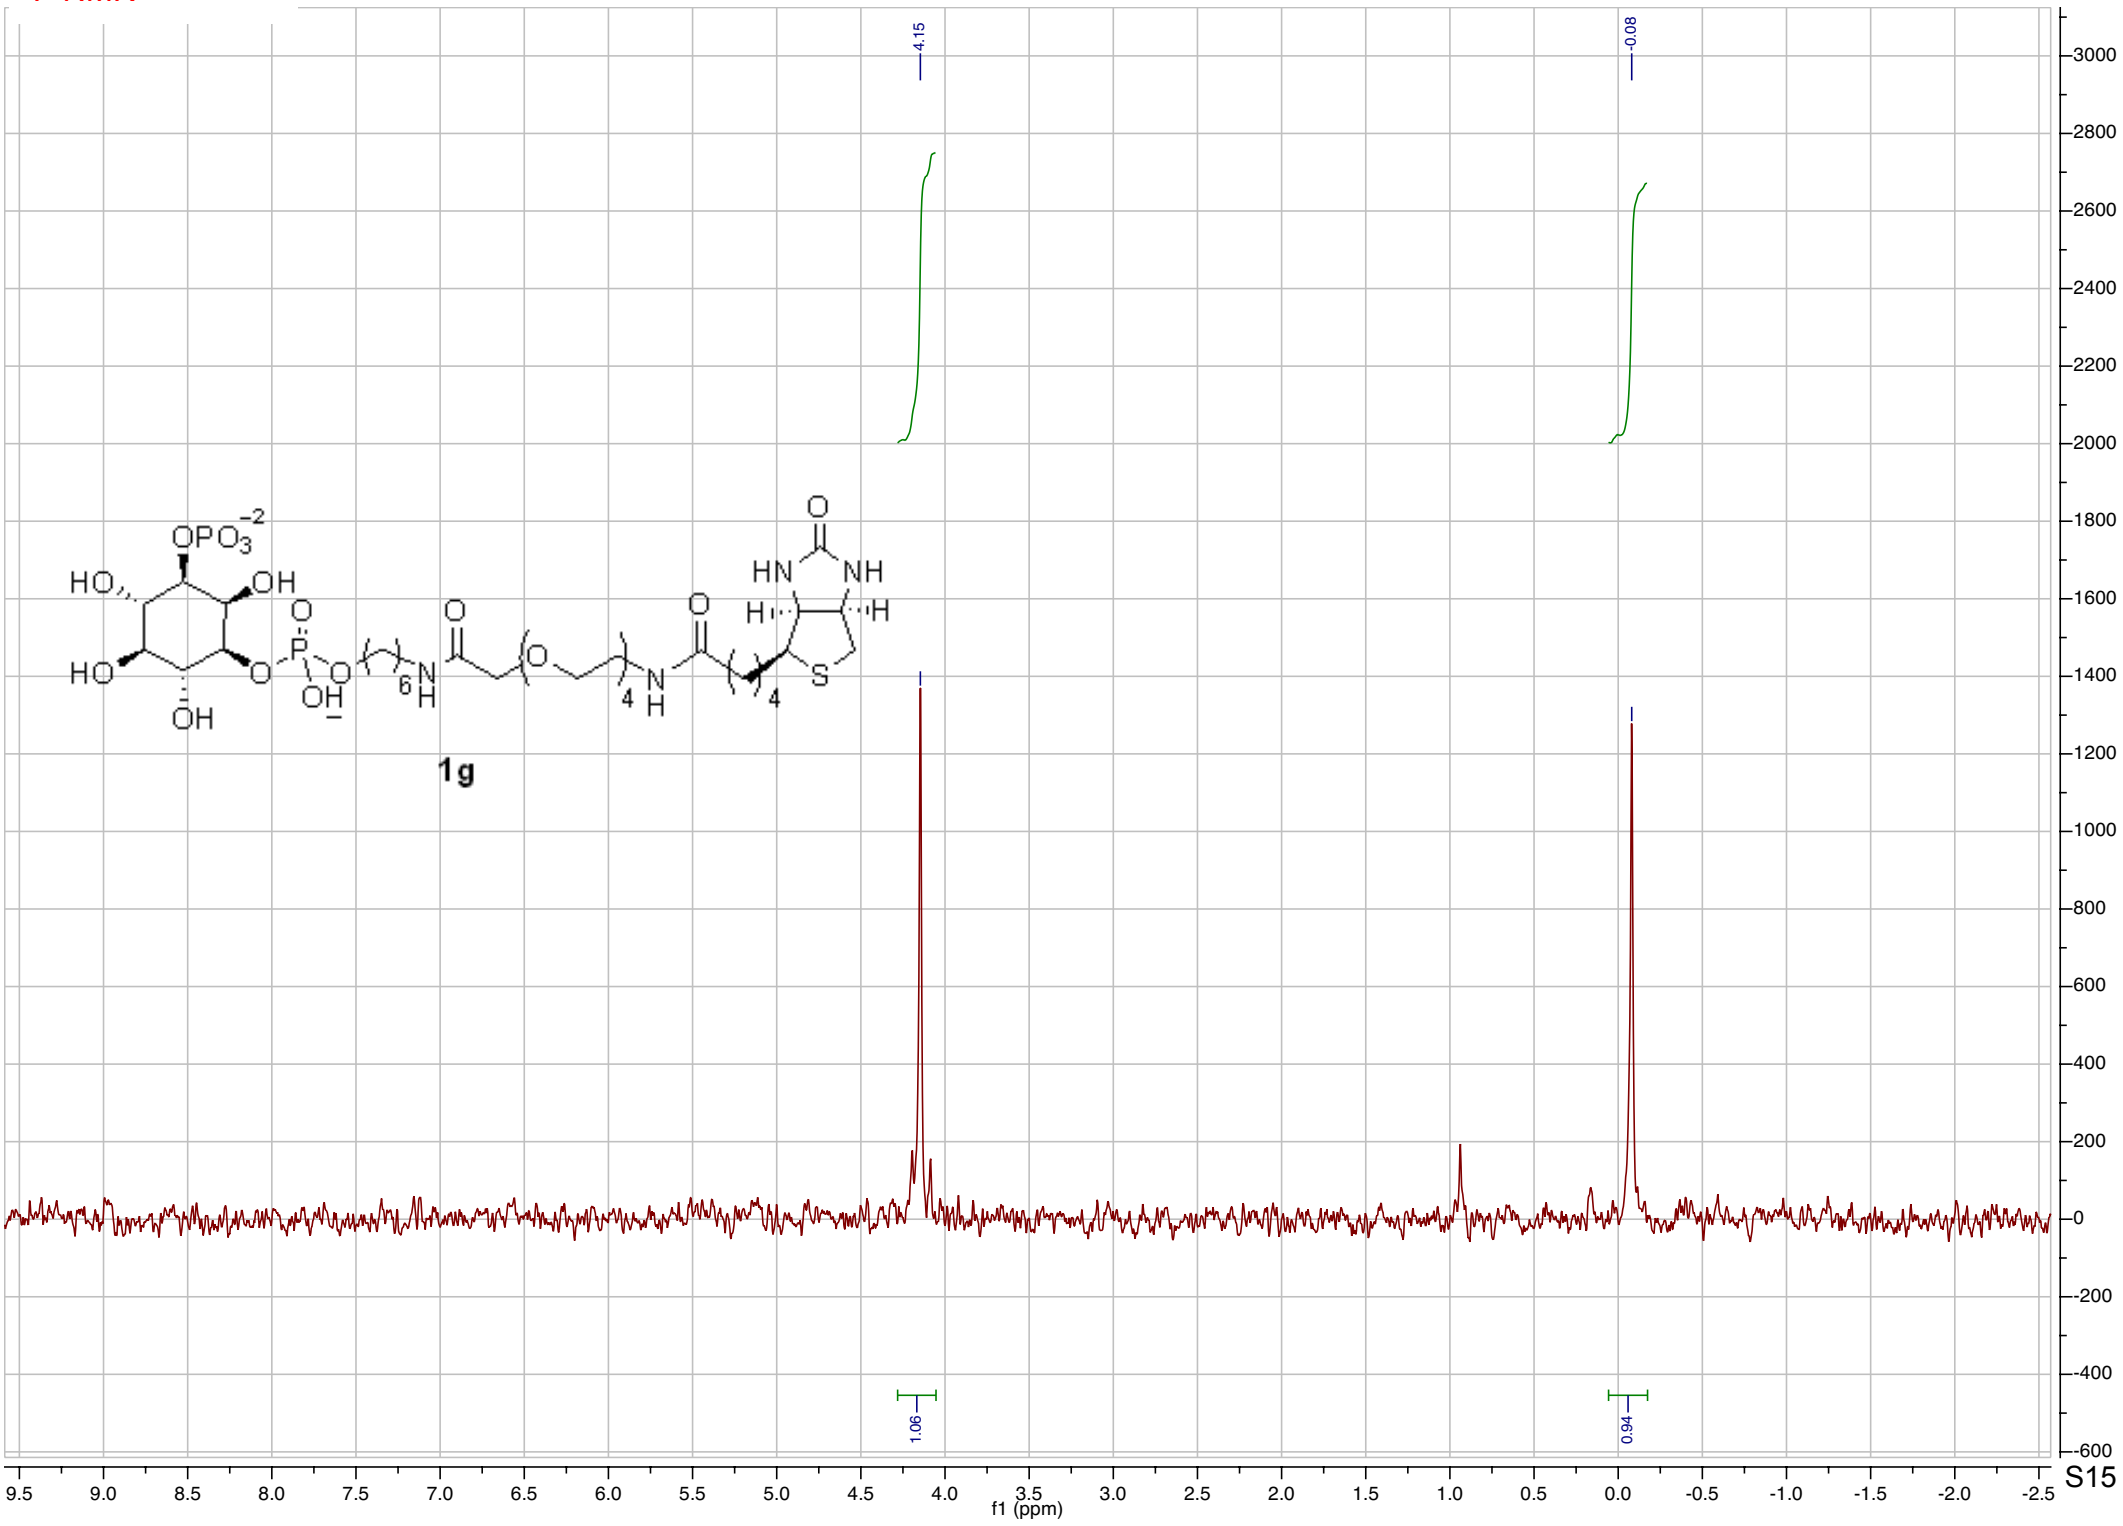

Supplement: NIHMS343599-supplement-01.pdf [file NIHMS343599-supplement-01.pdf]
